# Supplementary material for: Palladium/zinc co-catalyzed asymmetric transfer hydrogenation of oxabenzonorbornadienes with alcohols as hydrogen sources
Source: Royal Society of Chemistry journal article supplement (doi:10.1039/c7ob00175d), 2017-01-01
Supplement: c7ob00175d1.pdf [file c7ob00175d1.pdf]

## Palladium/Zinc Co-catalyzed Asymmetric Transfer Hydrogenation of Oxabenzonorbornadienes with Alcohols as Hydrogen Sources

Fujie Ma,<sup>a</sup> Jingchao Chen,<sup>a,\*</sup> Fan Yang,<sup>a</sup> Madhuri Vikas Shinde,<sup>a</sup> Yongyun Zhou<sup>a</sup> and Baomin Fan<sup>a,b,\*</sup>

a. YMU-HKBU Joint Laboratory of Traditional Natural Medicine, Yunnan Minzu University, Kunming, 650500, China. E-mail: chenjingchao84@163.com (J.-C. Chen); adams.bmf@hotmail.com (B.-M. Fan)

b. Key Laboratory of Chemistry in Ethnic Medicinal Resources, Yunnan Minzu University, Kunming, 650500, China.

### Supporting Information

#### Table of Contents

|                                                 |     |
|-------------------------------------------------|-----|
| A: Experimental Material                        | S2  |
| B: General Procedure                            | S2  |
| C: Characterization Data of Products            | S3  |
| D: References                                   | S4  |
| E: NMR spectra of Products                      | S5  |
| F: deuterium-labeling experiment                | S12 |
| G: HPLC spectra of Products                     | S13 |
| H: X-Ray Crystallography of Compound <b>3aa</b> | S20 |
| I: X-Ray Crystallography of Compound <b>4</b>   | S27 |

## A: Experimental Material

The reaction and manipulations were performed under an atmosphere of argon using standard Schlenk techniques and drybox (Mikrouna, Supper 1220/750). Anhydrous DME, THF, and dioxane were distilled from sodium benzophenoneketyl prior to use. Anhydrous DCM (Dichloromethane) was distilled from calcium hydride and stored under argon.  $^1\text{H}$  NMR and  $^{13}\text{C}$  NMR spectra were recorded on a Bruker-Advance 400 MHz or 100 MHz spectrometer, and  $\text{CDCl}_3$  or  $\text{C}_6\text{D}_6$  was used as solvent. Chemical shifts ( $\delta$ ) were reported in ppm with tetramethylsilane as internal standard, and  $J$  values were given in Hz. The enantioselective excesses were determined by Agilent 1260 Series HPLC using Daicel OJ-H or OD-H chiral columns eluted with a mixture of isopropyl alcohol and hexane. Melting points were measured on X-4 melting point apparatus and uncorrected. High resolution mass spectra (HRMS) were performed on a VG Autospec-3000 spectrometer. Column chromatography was performed with silica gel (200-300 mesh) with petroleum ether and ethyl acetate as eluents. Compound **3aa** is known in the literature.<sup>[1]</sup> Compounds **3ab-af** and **4** are new and their characterization data are as given in section C.

## B: General Procedure

### B<sub>1</sub>: General Procedure for Palladium / Zinc co-catalyzed Transfer Hydrogenation of Oxabenzonorbornadienes with Alcohols

$\text{Pd}(\text{OAc})_2$  and (*R*)-Phanephos in THF was added to a Schlenk tube under argon atmosphere, the resulting solution was stirred at room temperature for 30 minutes, then  $\text{Zn}(\text{OTf})_2$  was added. After stirred for 10 minutes, oxabenzonorbornadienes was added and the mixture was stirred for another 10 minutes before the addition of alcohols. The solution was stirred at room temperature (25°C) with TLC monitoring until the complete consumption of oxabenzonorbornadienes. After evaporation of the solvent under reduced pressure, the residue was purified by chromatography on a silica gel column to afford the desired products.

### B<sub>2</sub>: Reaction Procedure for additional reaction of Oxabenzonorbornadiene **1a** with Methanol

$\text{Pd}(\text{OAc})_2$  and (*R*)-Difluorophos in DCE was added to a Schlenk tube under argon atmosphere, the resulting solution was stirred at room temperature for 30 minutes, then  $\text{Zn}(\text{OTf})_2$  was added. After stirred for 10 minutes, oxabenzonorbornadiene **1a**, alcohols and DCE were added. The solution was stirred at 40°C with TLC monitoring until the complete consumption of oxabenzonorbornadiene **1a**. Then the solvent was removed under reduced pressure, the residue was purified by chromatography on a silica gel column to afford the desired product **4**.

## C: Characterization Data of Products

### (S)-1,2-dihydronaphthalen-1-ol (3aa)

White solid, 87% yield, 98% *ee*.  $[\alpha]_{\text{D}}^{18} = -53.0$  ( $c = 2.0 \times 10^{-3}$ ,  $\text{CH}_2\text{Cl}_2$ ); m.p. 50-52 °C;  $^1\text{H}$  NMR (400 MHz,  $\text{CDCl}_3$ )  $\delta$  7.31 (d,  $J = 7.2$  Hz, 1H), 7.27-7.23 (m, 2H), 7.12 (d,  $J = 6.8$  Hz, 1H), 6.54 (d,  $J = 9.6$  Hz, 1H), 6.00-5.96 (m, 1H), 4.76 (s, 1H), 2.58 (s, 2H), 1.94 (s, 1H). The *ee* of **3aa** was determined by HPLC analysis on a Daicel Chiralcel OD-H column, conditions: *n*-hexane/*i*-PrOH = 98/2, 0.5 mL/min,  $\lambda = 254$  nm;  $t_{\text{major}} = 11.2$  min,  $t_{\text{minor}} = 12.3$  min.

### (S)-6,7-dibromo-1,2-dihydronaphthalen-1-ol (3ab)

White solid, 78% yield, 97% *ee*.  $[\alpha]_{\text{D}}^{27} = +3.6$  ( $c = 1.2 \times 10^{-2}$ ,  $\text{CH}_2\text{Cl}_2$ ); m.p. 81-82 °C;  $^1\text{H}$  NMR (400 MHz,  $\text{CDCl}_3$ )  $\delta$  7.52 (s, 1H), 7.25 (s, 1H), 6.33 (d,  $J = 9.6$  Hz, 1H), 5.96 (t,  $J = 9.2$  Hz, 1H), 4.63 (t,  $J = 4.8$  Hz, 1H), 2.44 (s, 2H), 2.18 (s, 1H).  $^{13}\text{C}$  NMR (100 MHz,  $\text{CDCl}_3$ )  $\delta$  137.1, 133.5, 131.6, 131.1, 127.6, 125.6, 124.2, 122.8, 66.8, 32.4. HRMS calcd for  $\text{C}_{10}\text{H}_8\text{Br}_2\text{O}$   $[\text{M}]^+$ : 301.8942. Found: 301.8945. The *ee* of **3ab** was determined by HPLC analysis on a Daicel Chiralcel OJ-H column, conditions: *n*-hexane/*i*-PrOH = 95/5, 1 mL/min,  $\lambda = 254$  nm;  $t_{\text{major}} = 11.3$  min,  $t_{\text{minor}} = 14.7$  min.

### (S)-6,7-dimethyl-1,2-dihydronaphthalen-1-ol (3ac)

White solid, 81% yield, 98% *ee*.  $[\alpha]_{\text{D}}^{18} = -19.3$  ( $c = 1.4 \times 10^{-3}$ ,  $\text{CH}_2\text{Cl}_2$ ); m.p. 86-88 °C;  $^1\text{H}$  NMR (400 MHz,  $\text{CDCl}_3$ )  $\delta$  7.14 (s, 1H), 6.92 (s, 1H), 6.51 (d,  $J = 9.6$  Hz, 1H), 5.93 (t,  $J = 4.8$  Hz, 1H), 4.72 (d,  $J = 4.0$  Hz, 1H), 2.59 (d,  $J = 4.4$  Hz, 2H), 2.26 (d,  $J = 6.4$  Hz, 6H), 1.71 (d,  $J = 6.4$  Hz, 1H).  $^{13}\text{C}$  NMR (100 MHz,  $\text{CDCl}_3$ )  $\delta$  136.8, 136.0, 133.7, 130.4, 128.6, 128.0, 126.9, 67.5, 32.8, 19.7, 19.5. HRMS calcd for  $\text{C}_{12}\text{H}_{14}\text{O}$   $[\text{M}]^+$ : 174.1045. Found: 174.1048. The *ee* of **3ac** was determined by HPLC analysis on a Daicel Chiralcel OD-H column, conditions: *n*-hexane/*i*-PrOH = 95/5, 0.5 mL/min,  $\lambda = 254$  nm;  $t_{\text{major}} = 20.4$  min,  $t_{\text{minor}} = 21.9$  min.

### (S)-5,8-dimethoxy-1,2-dihydronaphthalen-1-ol (3ad)

White solid, 70% yield, 97% *ee*.  $[\alpha]_{\text{D}}^{26} = -46.7$  ( $c = 5.4 \times 10^{-3}$ ,  $\text{CH}_2\text{Cl}_2$ ); m.p. 60-62 °C;  $^1\text{H}$  NMR (400 MHz,  $\text{CDCl}_3$ )  $\delta$  6.86 (d,  $J = 9.8$  Hz, 1H), 6.69 (q,  $J = 8.9$  Hz, 2H), 5.94 (t,  $J = 7.5$  Hz, 1H), 5.10 (d,  $J = 5.2$  Hz, 1H), 3.74 (d,  $J = 13.4$  Hz, 6H), 2.66-2.41 (m, 2H), 2.07 (s, 1H).  $^{13}\text{C}$  NMR (100 MHz,  $\text{CDCl}_3$ )  $\delta$  150.7, 149.5, 124.9, 124.5, 122.8, 120.4, 111.1, 110.1, 60.3, 56.2, 56.0, 31.5. HRMS calcd for  $\text{C}_{12}\text{H}_{14}\text{O}_3$   $[\text{M}]^+$ : 206.0943. Found: 206.0947. The *ee* of **3ad** was determined by HPLC analysis on a Daicel Chiralcel OD-H column, conditions: *n*-hexane/*i*-PrOH = 90/10, 0.5 mL/min,  $\lambda = 254$  nm;  $t_{\text{minor}} = 19.6$  min,  $t_{\text{major}} = 21.7$  min.

### (S)-2,3,6,7-tetrahydronaphtho[2,3-*b*][1,4]dioxin-6-ol (3ae)

White solid, 67% yield, 98% *ee*.  $[\alpha]_{\text{D}}^{26} = +1.2$  ( $c = 7.6 \times 10^{-3}$ ,  $\text{CHCl}_3$ ); m.p. 63-65 °C;  $^1\text{H}$  NMR (400 MHz,  $\text{C}_6\text{D}_6$ )  $\delta$  7.09 (s, 1H), 6.73 (s, 1H), 6.25 (d,  $J = 9.6$  Hz, 1H), 5.65-5.60 (m, 1H), 4.52 (t,  $J = 6.4$  Hz,

1H), 3.57 (s, 4H), 2.34-2.27 (m, 1H), 2.24-2.17(m, 1H). <sup>13</sup>C NMR (100 MHz, C<sub>6</sub>D<sub>6</sub>) δ 144.1, 143.8, 132.1, 127.9, 127.5, 124.6, 117.0, 116.2, 68.1, 64.9, 64.8, 33.6. HRMS calcd for C<sub>12</sub>H<sub>12</sub>O<sub>3</sub> [M]<sup>+</sup>: 204.0786. Found: 204.0777. The *ee* of **3ae** was determined by HPLC analysis on a Daicel Chiralcel OD-H column, conditions: *n*-hexane/*i*-PrOH = 90/10, 1 mL/min, λ = 254 nm; *t*<sub>minor</sub> = 10.0 min, *t*<sub>major</sub> = 13.8 min.

### (S)-5,6-dihydronaphtho[2,3-*d*][1,3]dioxin-5-ol (**3af**)

White solid, 35% yield, 98% *ee*. [α]<sub>D</sub><sup>18</sup> = -15.2 (c = 4.2×10<sup>-3</sup>, CHCl<sub>3</sub>); m.p. 68-70 °C; <sup>1</sup>H NMR (400 MHz, C<sub>6</sub>D<sub>6</sub>) δ 6.87 (s, 1H), 6.58 (s, 1H), 6.17 (s, 1H), 5.87 (d, *J* = 9.6 Hz, 1H), 5.33-5.28 (m, 1H), 5.03-5.02 (m, 2H), 4.12 (t, *J* = 6.4 Hz, 1H), 2.00-1.94 (m, 1H), 1.90-1.83 (m, 1H). <sup>13</sup>C NMR (100 MHz, C<sub>6</sub>D<sub>6</sub>) δ 147.5, 147.0, 131.7, 127.1, 123.6, 107.9, 107.2, 104.1, 100.8, 67.7, 32.8. The *ee* of **3af** was determined by HPLC analysis on a Daicel Chiralcel OD-H column, conditions: *n*-hexane/*i*-PrOH = 90/10, 1 mL/min, λ = 254 nm; *t*<sub>minor</sub> = 7.1 min, *t*<sub>major</sub> = 8.4 min.

### (1*R*,2*S*)-2-methoxy-1,2-dihydronaphthalen-1-ol (**4**)

White solid, 17% yield, 94% *ee*. [α]<sub>D</sub><sup>17</sup> = 154.1 (c = 1.48×10<sup>-3</sup>, CHCl<sub>3</sub>); m.p. 65-67 °C; <sup>1</sup>H NMR (400 MHz, CDCl<sub>3</sub>) δ 7.54-7.52 (m, 1H), 7.28-7.25 (m, 2H), 7.13-7.10 (m, 1H), 6.59 (d, *J* = 9.6 Hz, 1H), 6.08 (dd, *J* = 4.0, 9.6 Hz, 1H), 4.79 (t, *J* = 6.4 Hz, 1H), 4.03 (t, *J* = 4.4 Hz, 1H), 3.46 (s, 3H), 2.66 (d, *J* = 7.6 Hz, 1H). <sup>13</sup>C NMR (100 MHz, CDCl<sub>3</sub>) δ 136.1, 131.9, 128.3, 128.2, 126.9, 125.5, 75.9, 69.0, 56.8. The *ee* was determined by HPLC analysis on a Daicel Chiralcel OD-H column, conditions: *n*-hexane/*i*-PrOH = 98/2, 1 mL/min, λ = 254 nm; *t*<sub>minor</sub> = 9.0 min, *t*<sub>major</sub> = 10.2 min.

**Note:** The asymmetric reductive products **3ae** and **3af** are unstable, and tend to rearrange to the corresponding ketones **3ae'** and **3af'** spontaneously (Figure S1).

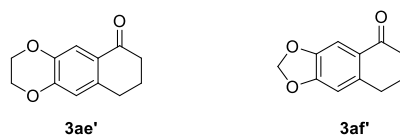

Figure S1. The chemical structures of ketones **3ae'** and **3af'**.

## D: References

1. M. Lautens, T. Rovis, *J. Org. Chem.*, 1997, **62**, 5246-5247.

## E: NMR spectra of Products

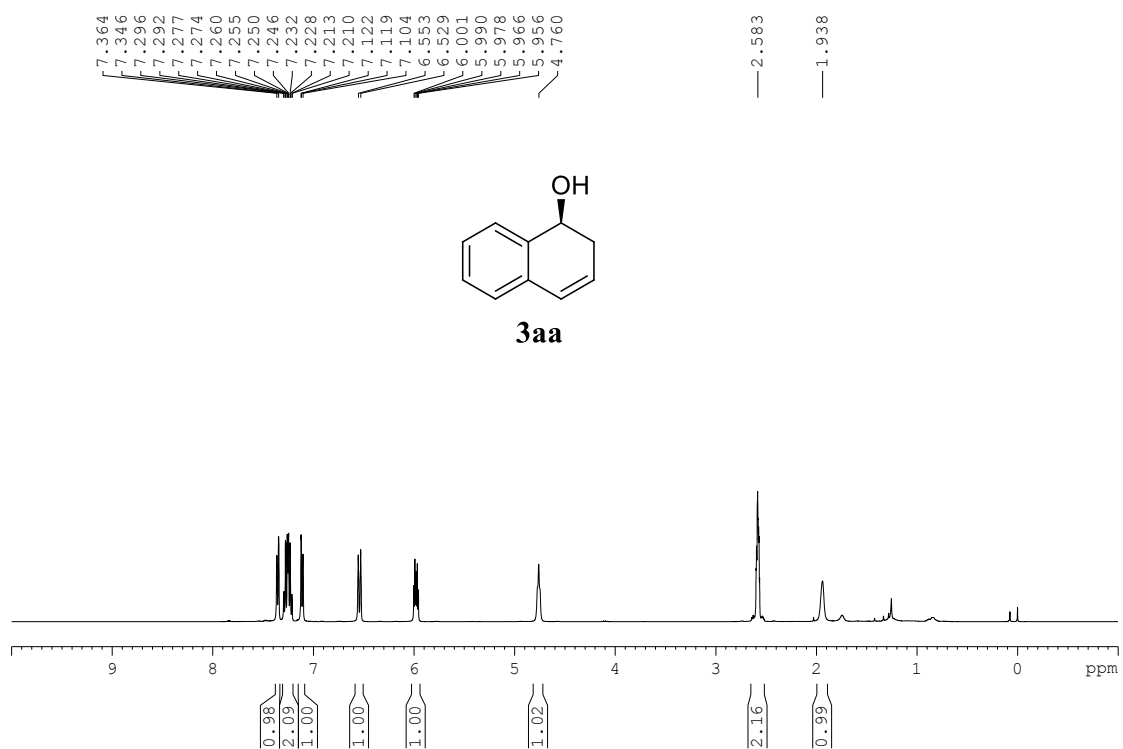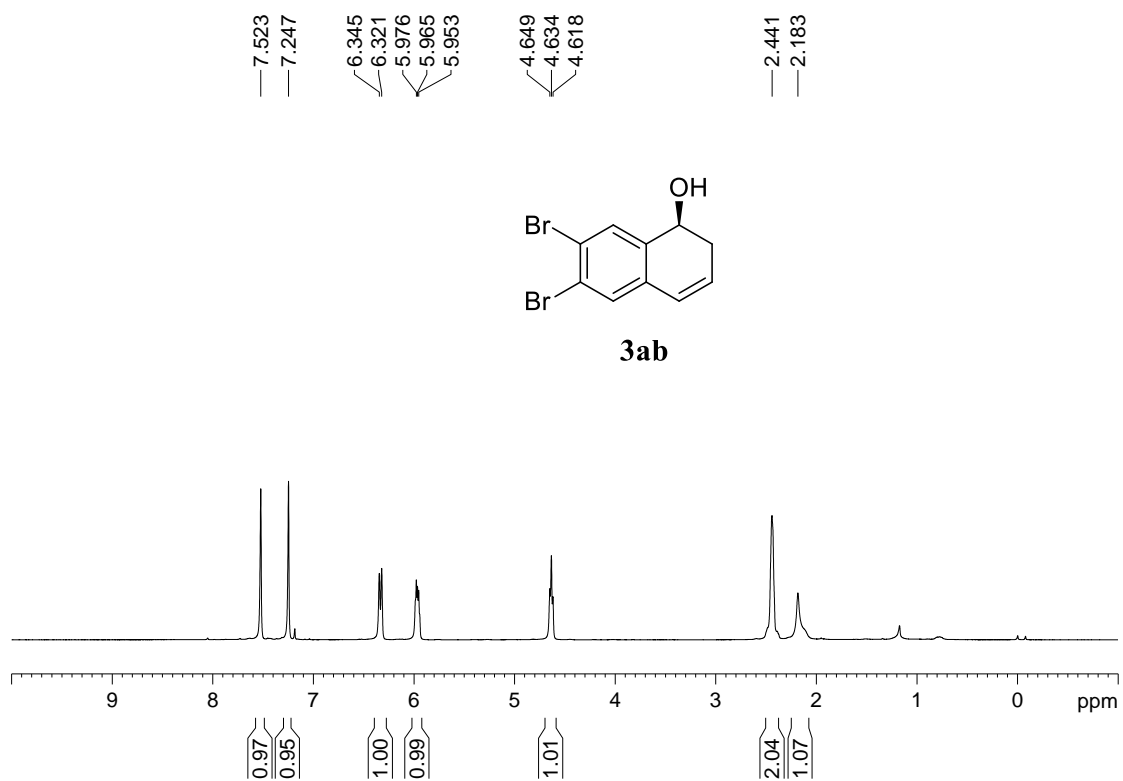

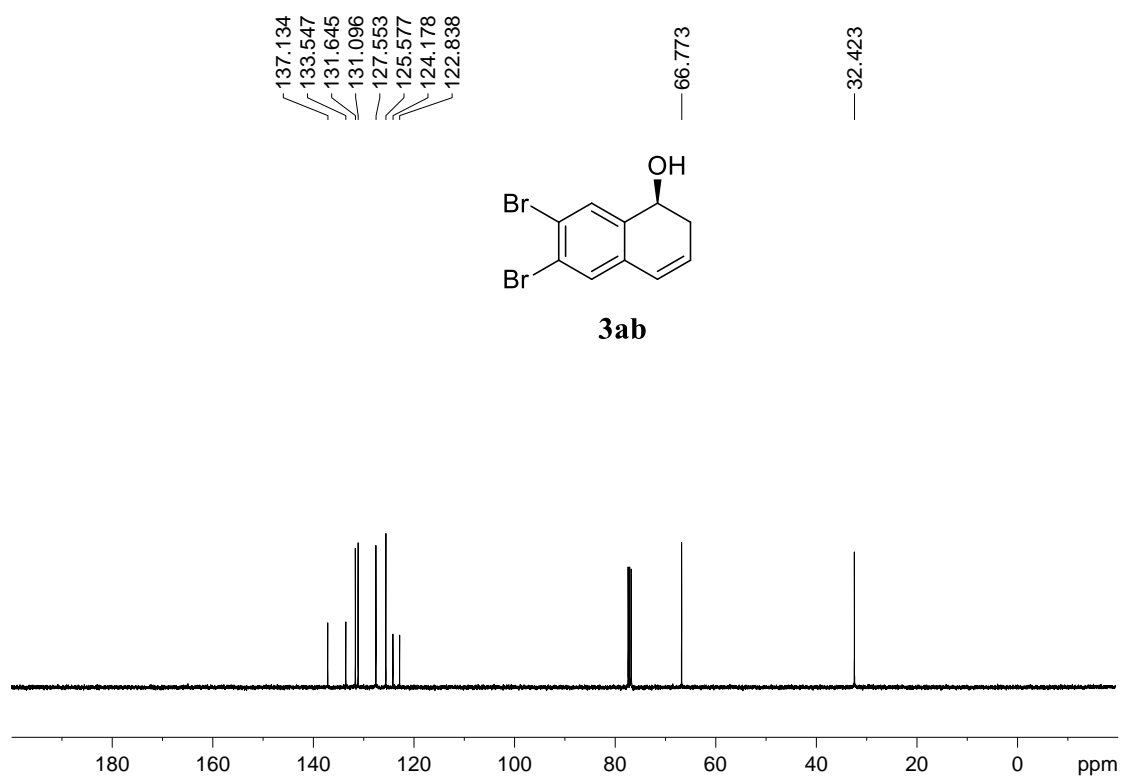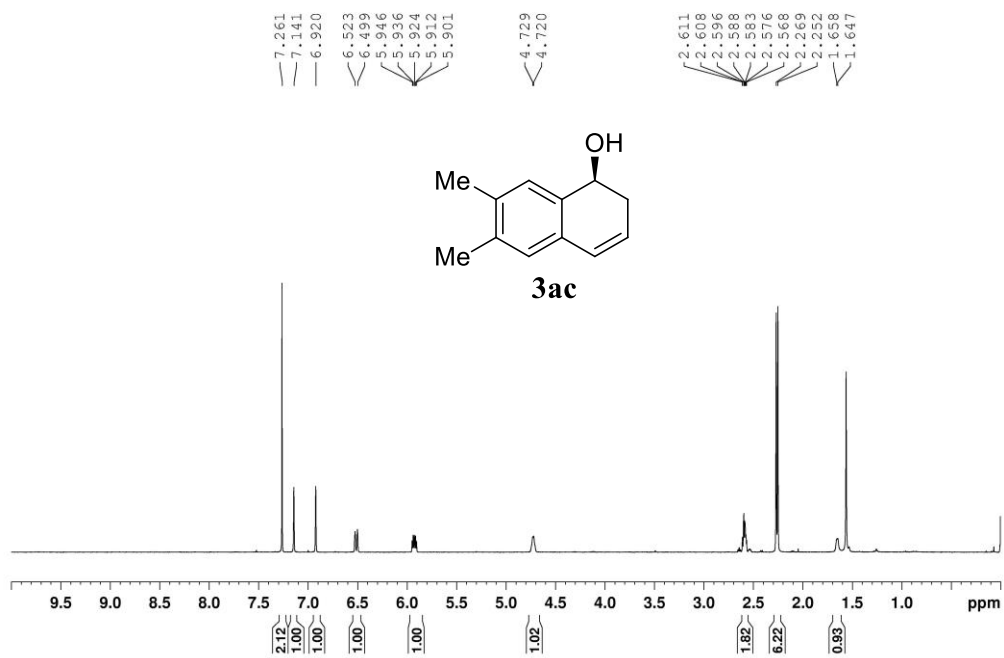

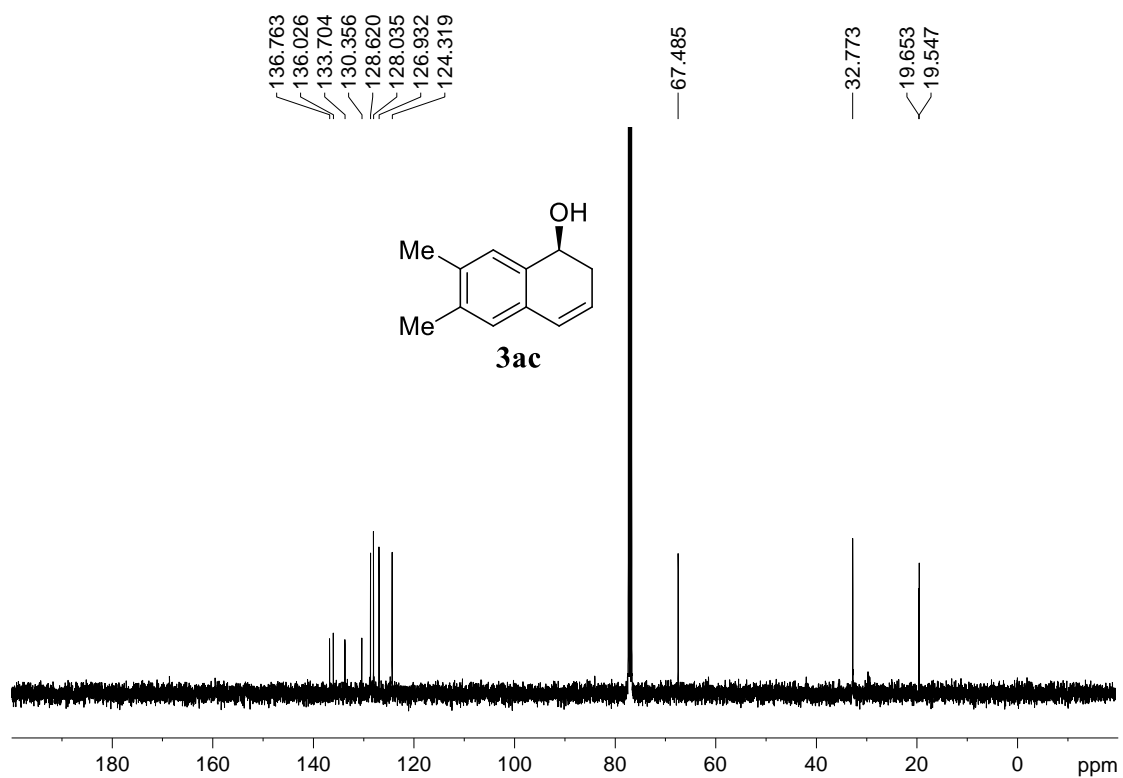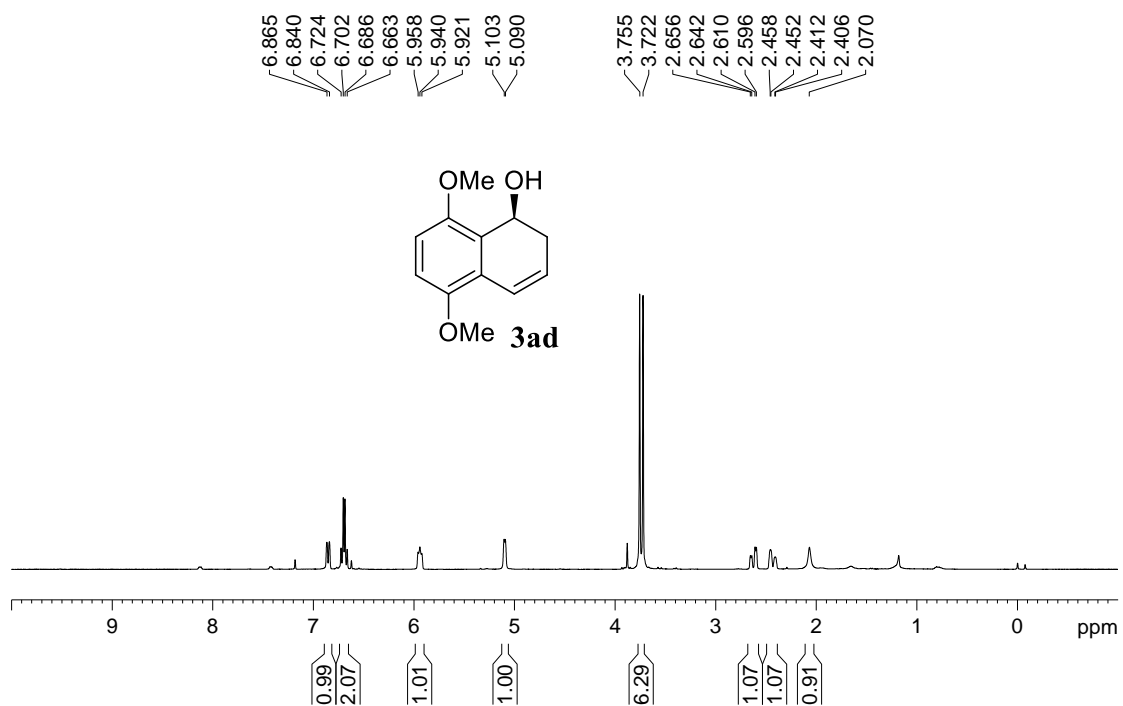

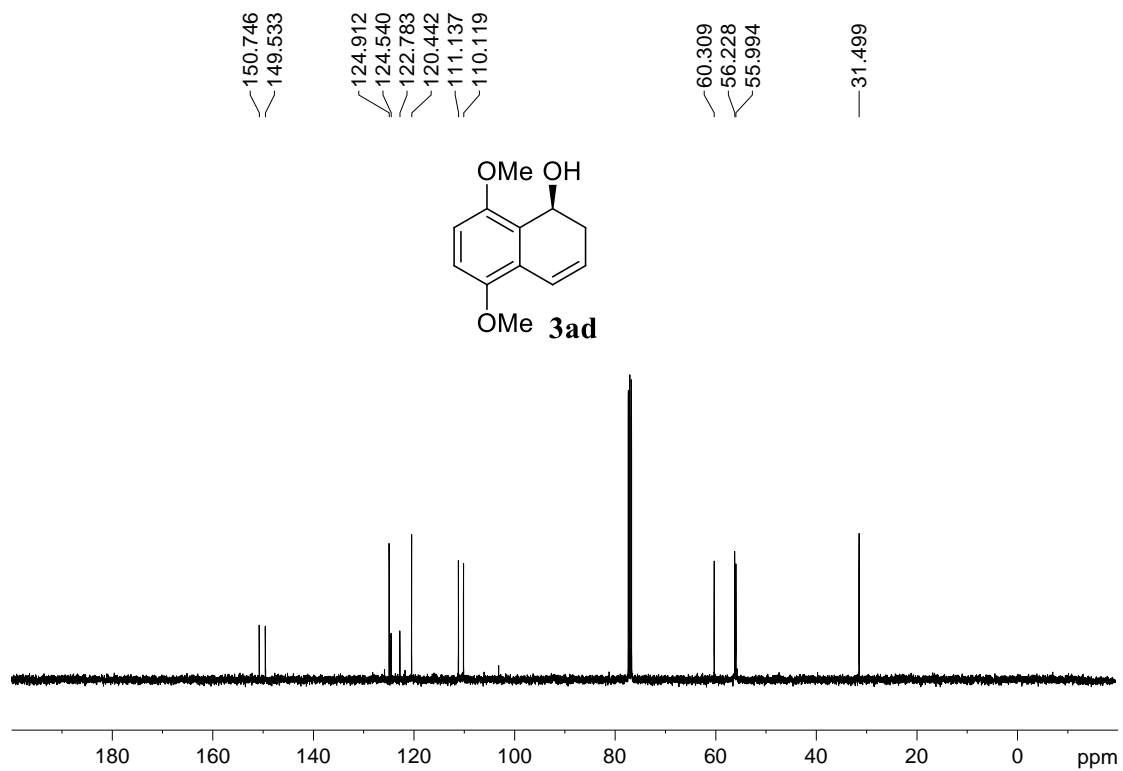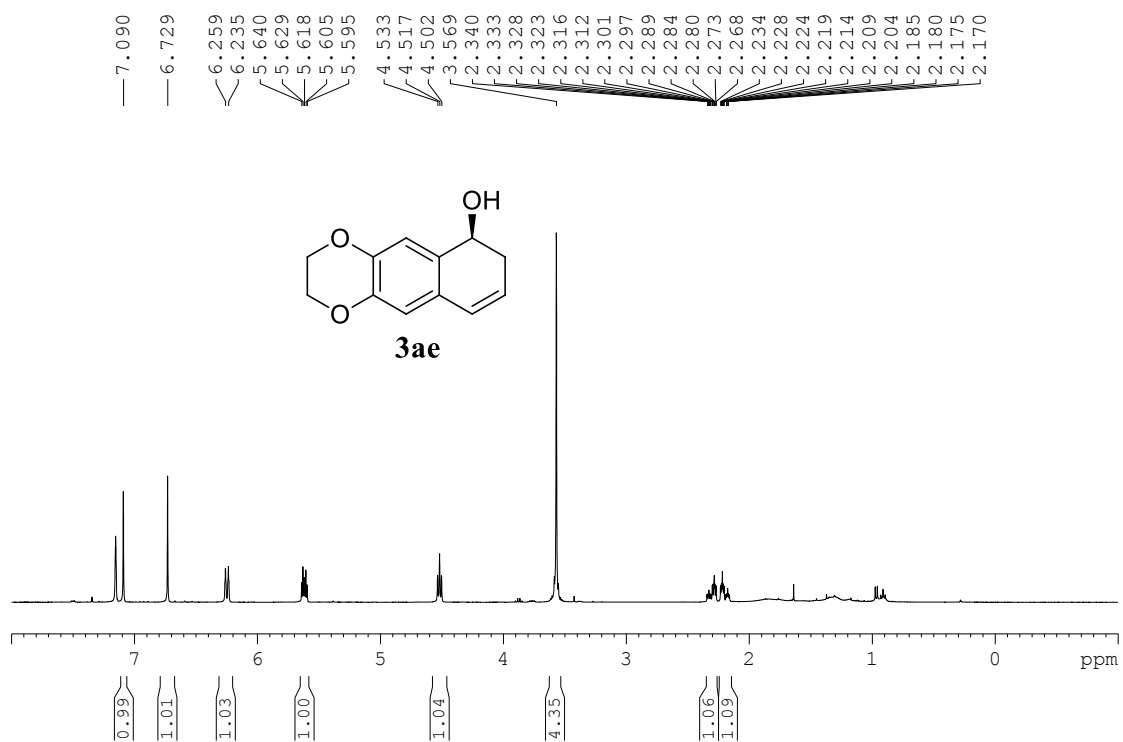



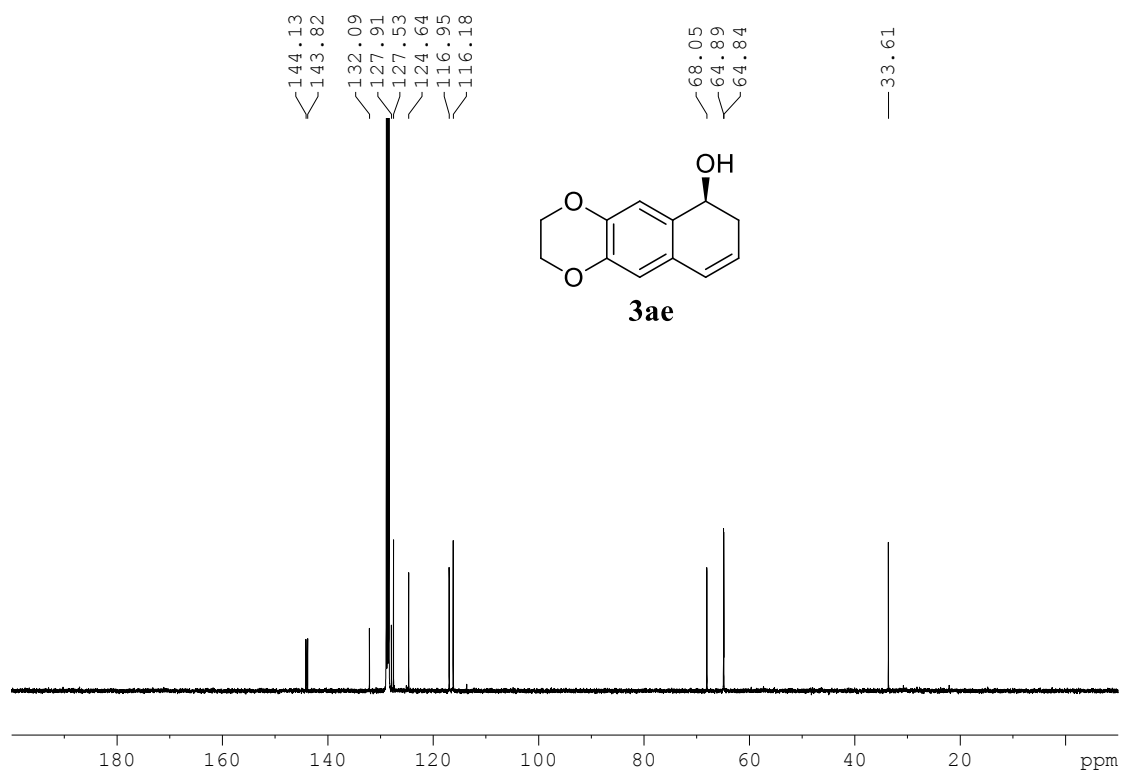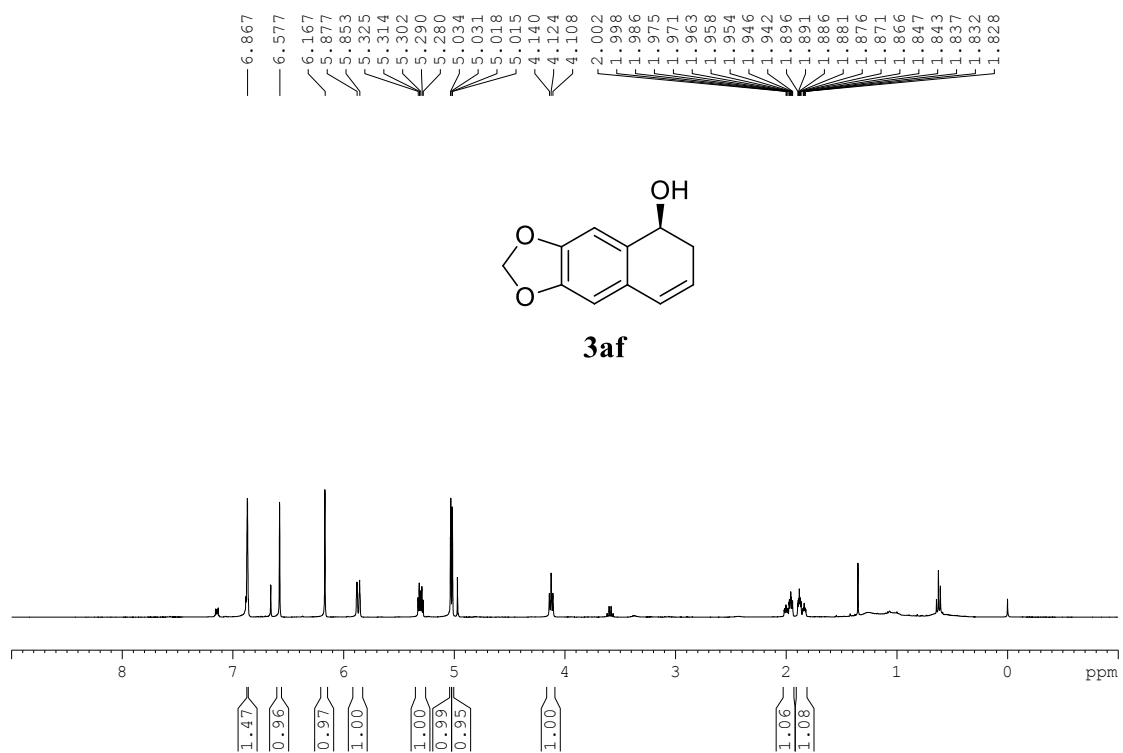

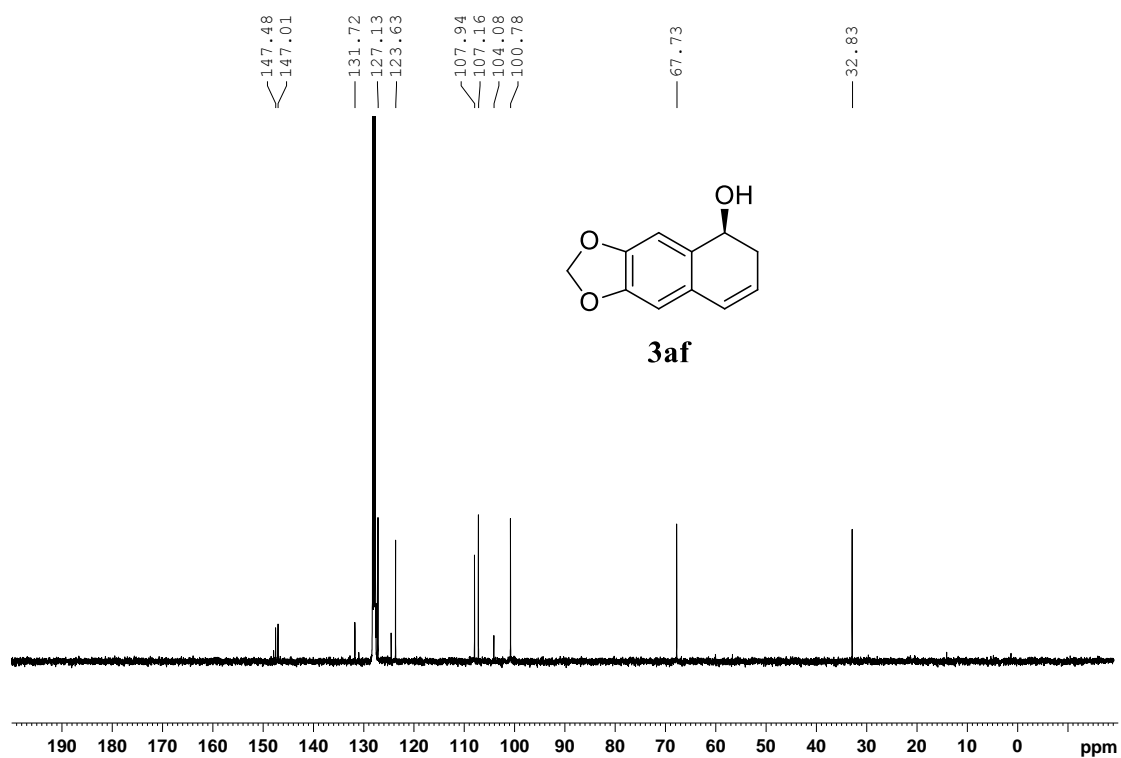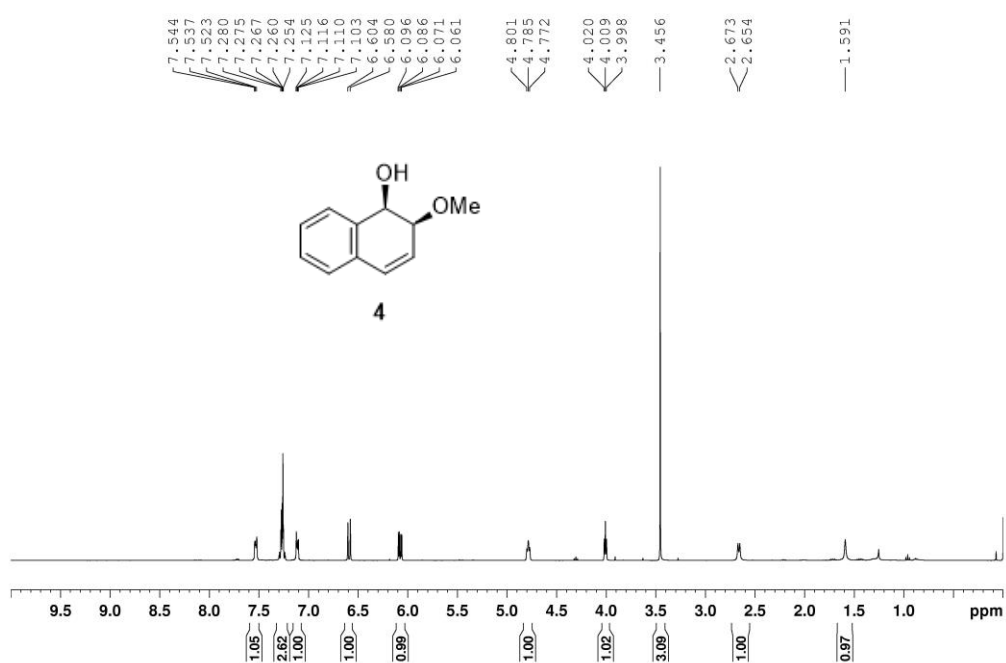

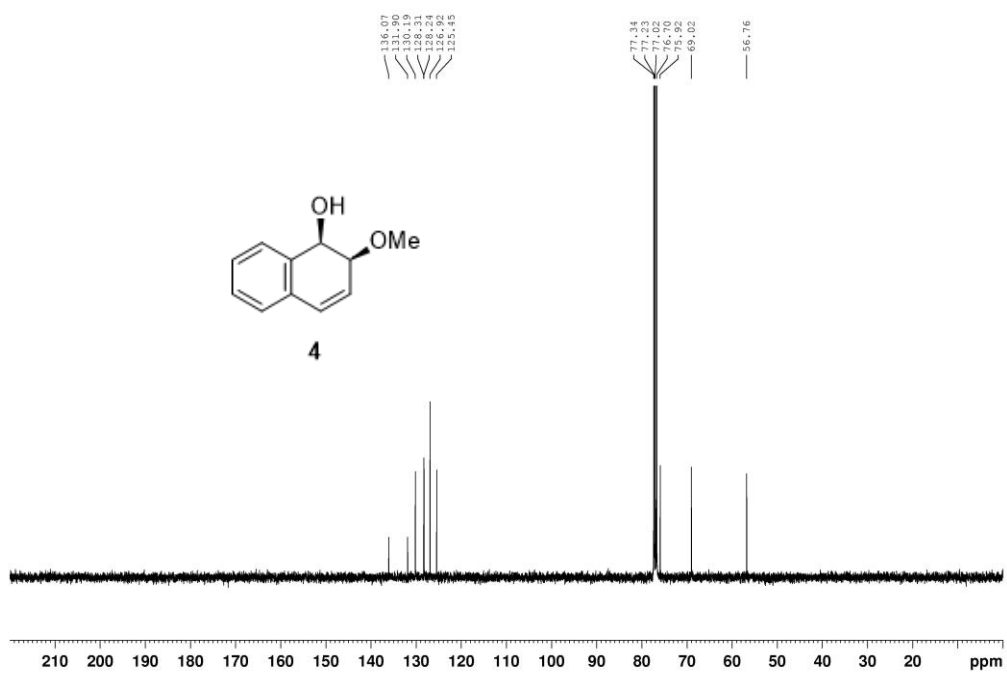

## F: deuterium-labeling experiment

To confirm the hydrogen source of current reductive reaction, the reaction was performed by using CD<sub>3</sub>OH instead of MeOH, about 89% deuterium was found in the 1,2-dihydronaphthalene structure of the product. This result indicates that the hydrogen atom on the 1,2-dihydronaphthalene moiety was derived exclusively from the methyl group of CD<sub>3</sub>OH (Figure S1).

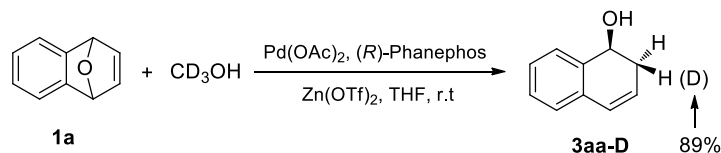

Figure S1. The reaction of 1a with CD<sub>3</sub>OH.

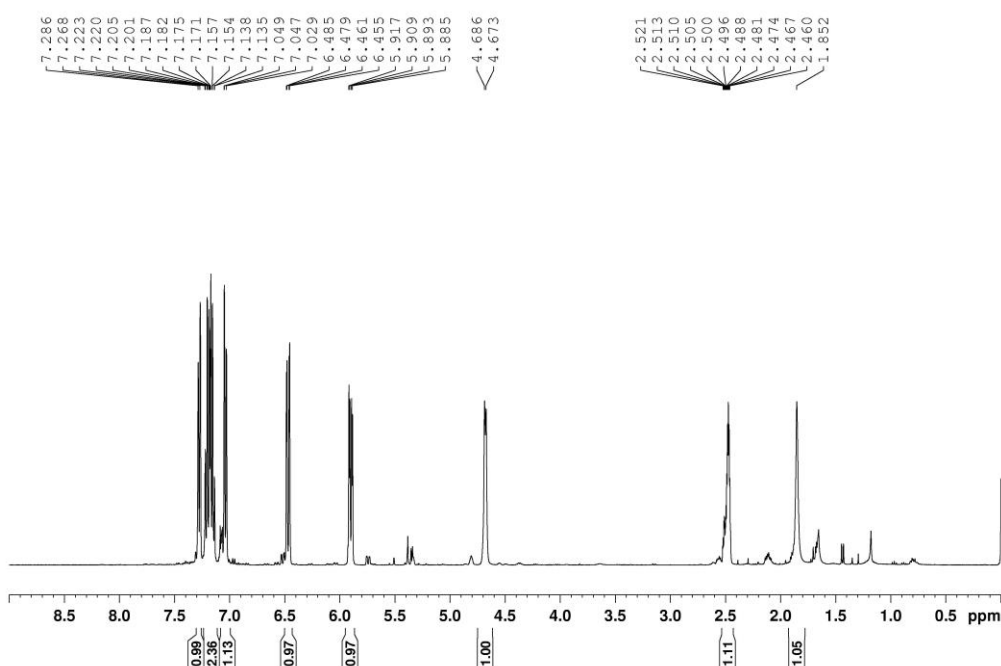

Figure S2. <sup>1</sup>H NMR spectrum of 3aa-D.

## G: HPLC spectra of Products

Note: The racemic products were prepared by using (±)-binap or (±)-xylyl-phanephos as ligand.

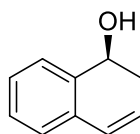

Racemic:

3aa

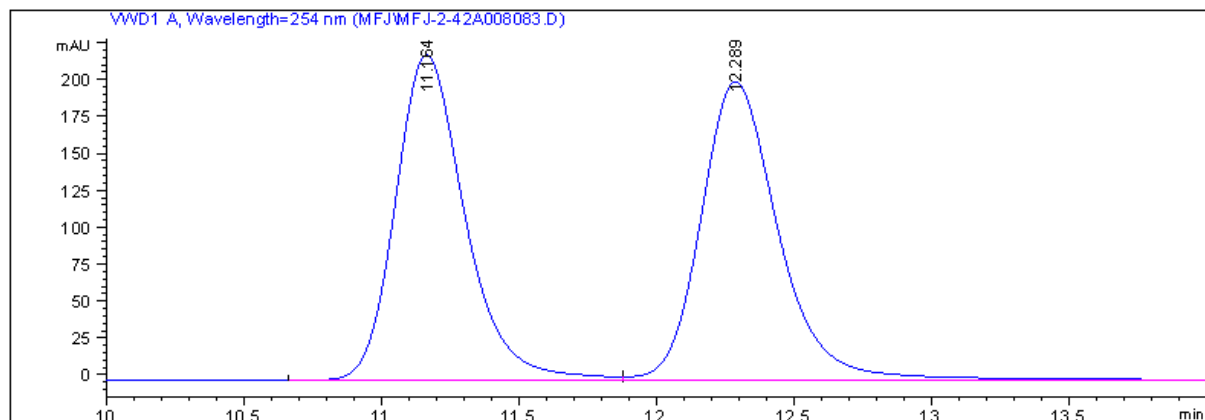

| Peak # | RetTime [min] | Type | Width [min] | Area [mAU*s] | Height [mAU] | Area %  |
|--------|---------------|------|-------------|--------------|--------------|---------|
| 1      | 11.164        | BV   | 0.2684      | 3878.87622   | 220.36636    | 49.1417 |
| 2      | 12.289        | VB   | 0.3017      | 4014.37134   | 202.14207    | 50.8583 |

Enantioenriched:

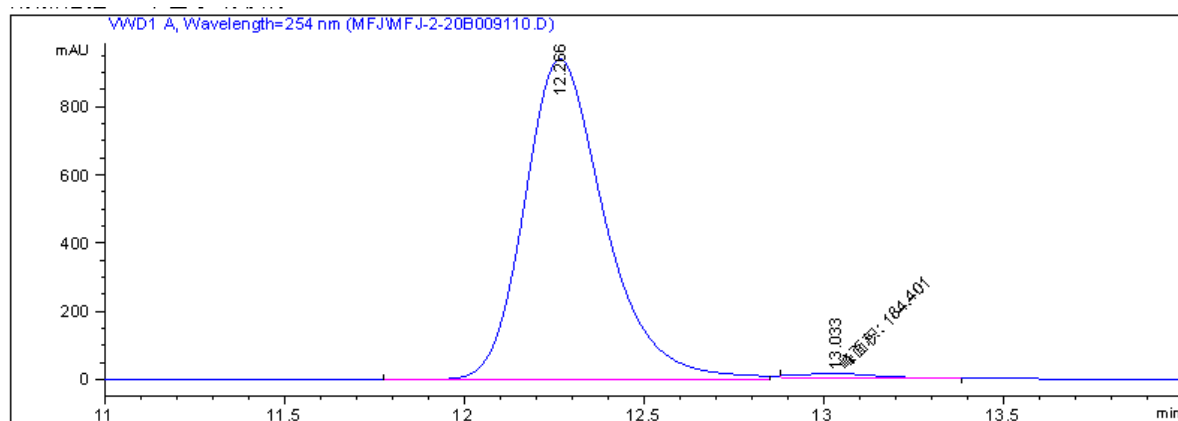

| Peak # | RetTime [min] | Type | Width [min] | Area [mAU*s] | Height [mAU] | Area %  |
|--------|---------------|------|-------------|--------------|--------------|---------|
| 1      | 11.149        | BV   | 0.2729      | 7203.36133   | 402.20056    | 98.9837 |
| 2      | 12.233        | MM   | 0.2806      | 73.96051     | 4.39222      | 1.0163  |

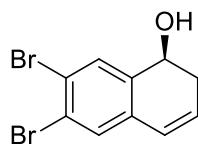**3ab****Racemic:**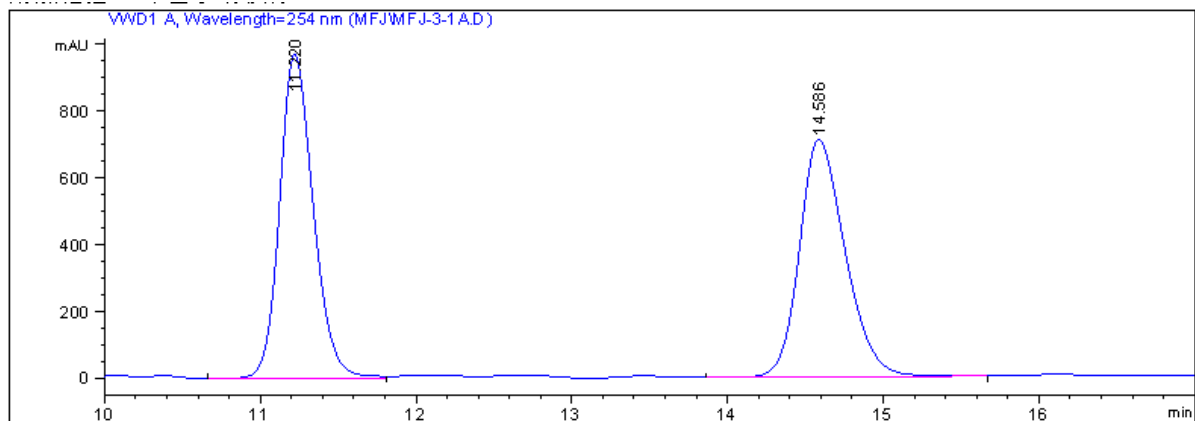

| Peak # | RetTime [min] | Type | Width [min] | Area [mAU*s] | Height [mAU] | Area %  |
|--------|---------------|------|-------------|--------------|--------------|---------|
| 1      | 11.220        | BV   | 0.2296      | 1.45095e4    | 969.27100    | 50.0971 |
| 2      | 14.586        | BB   | 0.3091      | 1.44532e4    | 711.27466    | 49.9029 |

**Enantioenriched:**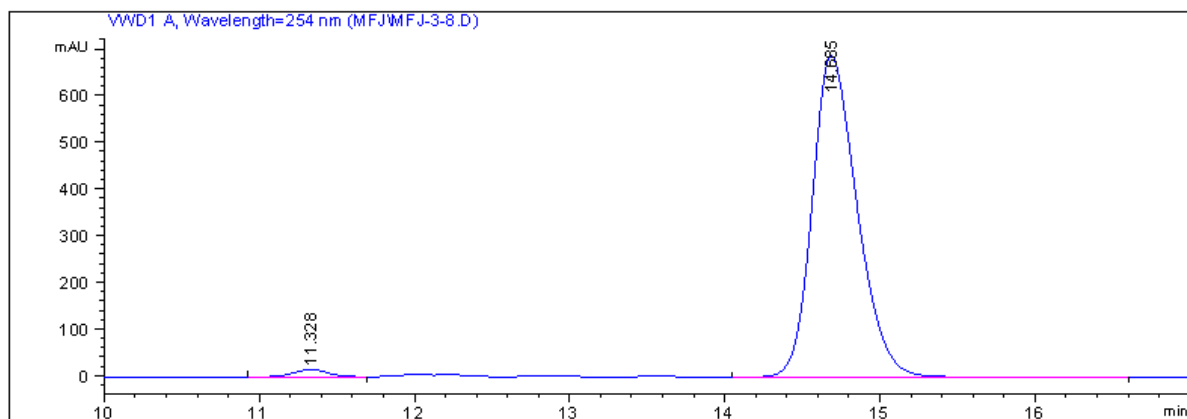

| Peak # | RetTime [min] | Type | Width [min] | Area [mAU*s] | Height [mAU] | Area %  |
|--------|---------------|------|-------------|--------------|--------------|---------|
| 1      | 11.328        | BV   | 0.2233      | 224.56718    | 15.56895     | 1.6011  |
| 2      | 14.685        | BB   | 0.3058      | 1.38017e4    | 688.69122    | 98.3989 |

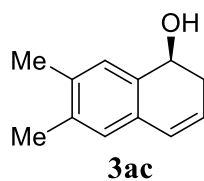

**Racemic:**

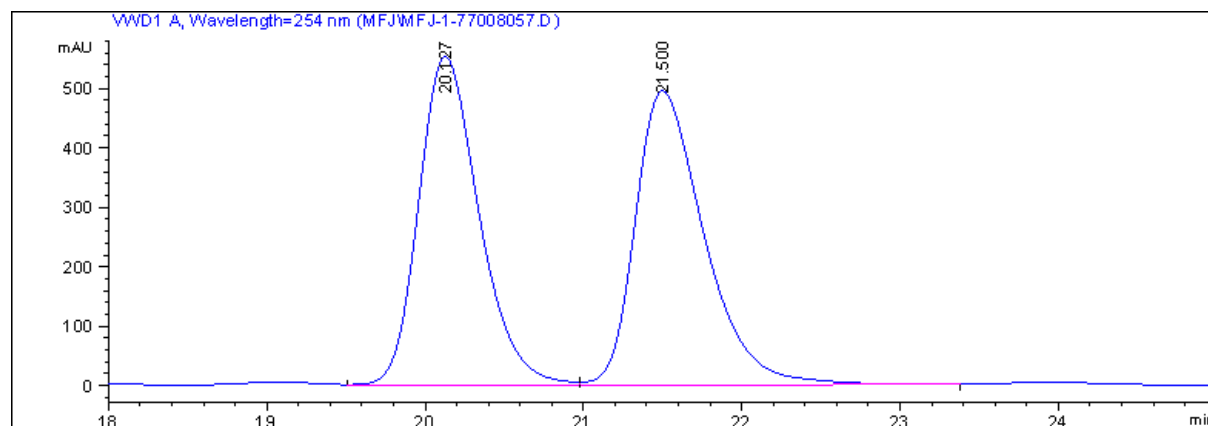

| Peak # | RetTime [min] | Type | Width [min] | Area [mAU*s] | Height [mAU] | Area %  |
|--------|---------------|------|-------------|--------------|--------------|---------|
| 1      | 20.127        | VV   | 0.4066      | 1.46285e4    | 553.08539    | 49.4330 |
| 2      | 21.500        | VB   | 0.4627      | 1.49641e4    | 495.01807    | 50.5670 |

**Enantioenriched:**

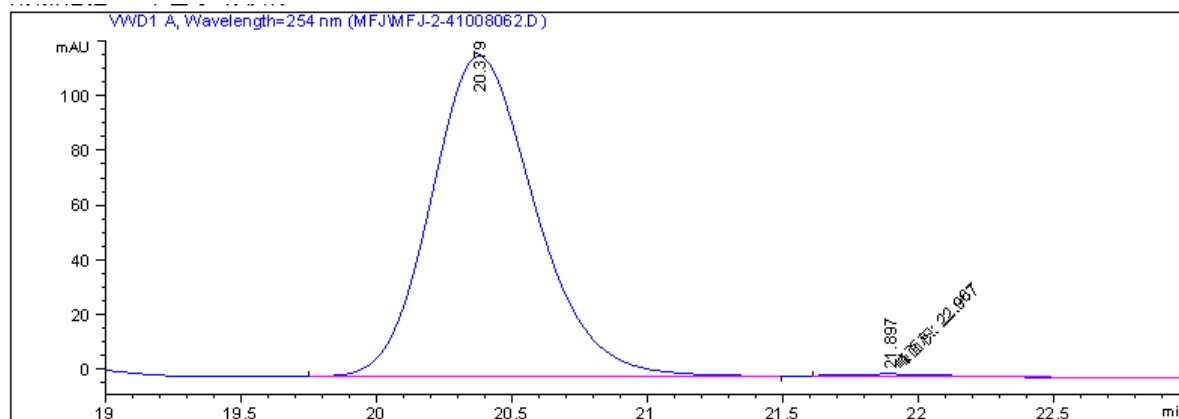

| Peak # | RetTime [min] | Type | Width [min] | Area [mAU*s] | Height [mAU] | Area %  |
|--------|---------------|------|-------------|--------------|--------------|---------|
| 1      | 20.379        | BB   | 0.4118      | 3127.00952   | 116.98811    | 99.2709 |
| 2      | 21.897        | MM   | 0.4109      | 22.96701     | 9.31483e-1   | 0.7291  |

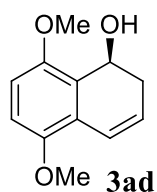

**Racemic:**

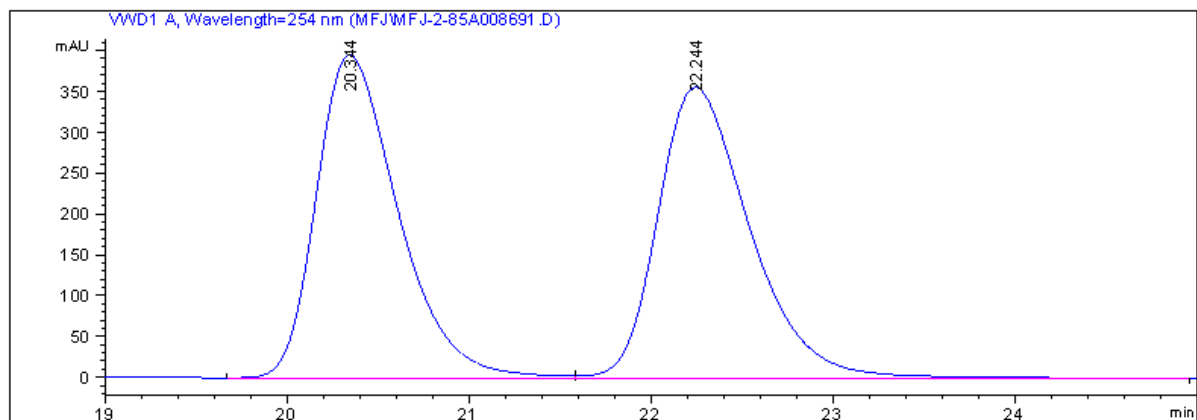

| Peak # | RetTime [min] | Type | Width [min] | Area [mAU*s] | Height [mAU] | Area %  |
|--------|---------------|------|-------------|--------------|--------------|---------|
| 1      | 20.344        | BV   | 0.4788      | 1.23722e4    | 395.63742    | 49.6789 |
| 2      | 22.244        | VB   | 0.5385      | 1.25321e4    | 356.14688    | 50.3211 |

**Enantioenriched:**

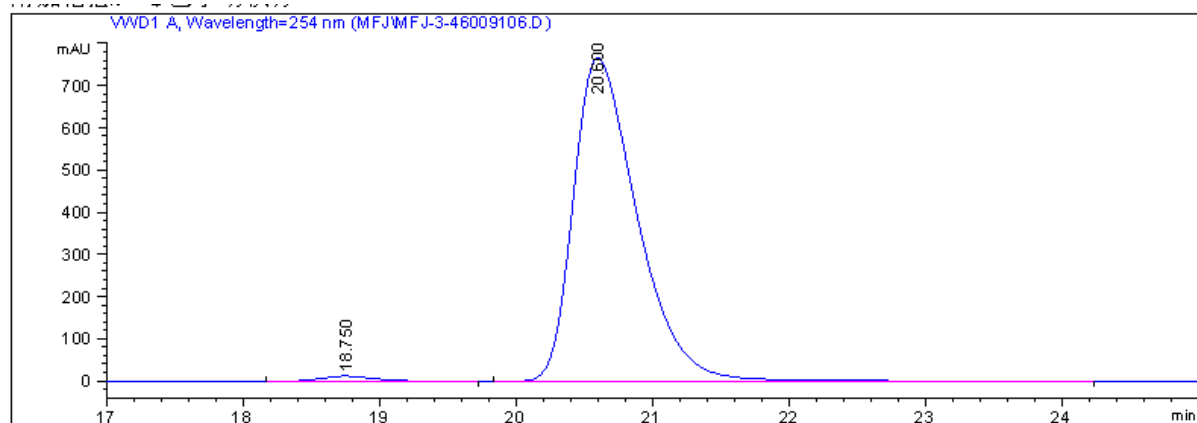

| Peak # | RetTime [min] | Type | Width [min] | Area [mAU*s] | Height [mAU] | Area %  |
|--------|---------------|------|-------------|--------------|--------------|---------|
| 1      | 18.750        | BB   | 0.4222      | 321.79080    | 11.79918     | 1.2742  |
| 2      | 20.600        | BB   | 0.4974      | 2.49326e4    | 766.72620    | 98.7258 |



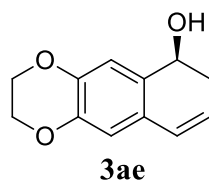

**Racemic:**

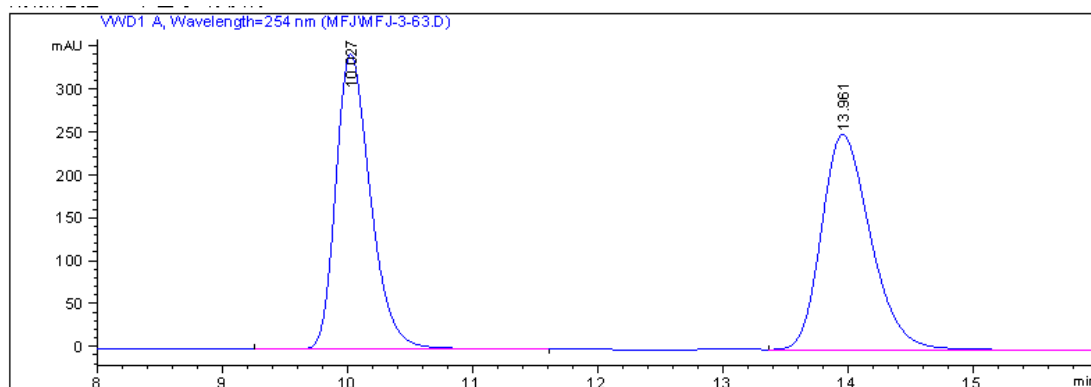

| Peak # | RetTime [min] | Type | Width [min] | Area [mAU*s] | Height [mAU] | Area %  |
|--------|---------------|------|-------------|--------------|--------------|---------|
| 1      | 10.027        | BB   | 0.2965      | 6653.89063   | 344.25003    | 49.2943 |
| 2      | 13.961        | VB   | 0.4215      | 6844.40820   | 250.74236    | 50.7057 |

**Enantioenriched:**

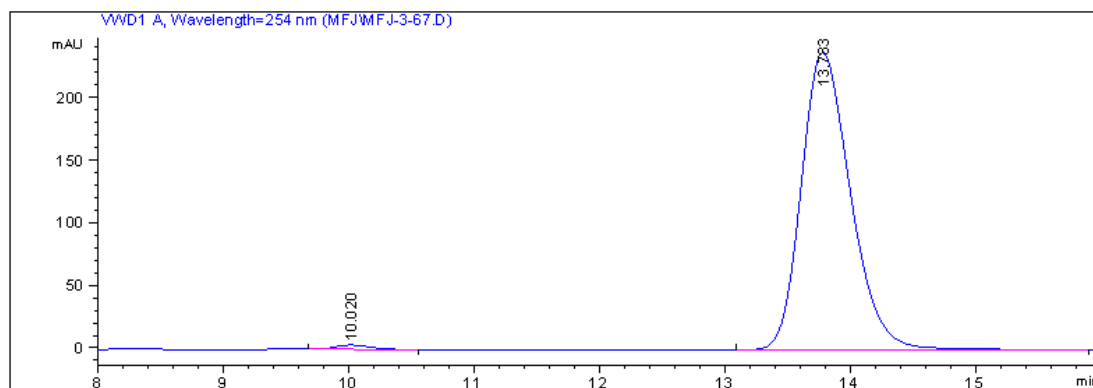

| Peak # | RetTime [min] | Type | Width [min] | Area [mAU*s] | Height [mAU] | Area %  |
|--------|---------------|------|-------------|--------------|--------------|---------|
| 1      | 10.020        | BB   | 0.2819      | 61.80041     | 3.38676      | 0.9495  |
| 2      | 13.783        | BB   | 0.4199      | 6446.79590   | 237.35980    | 99.0505 |

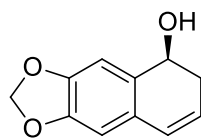**3af****Racemic:**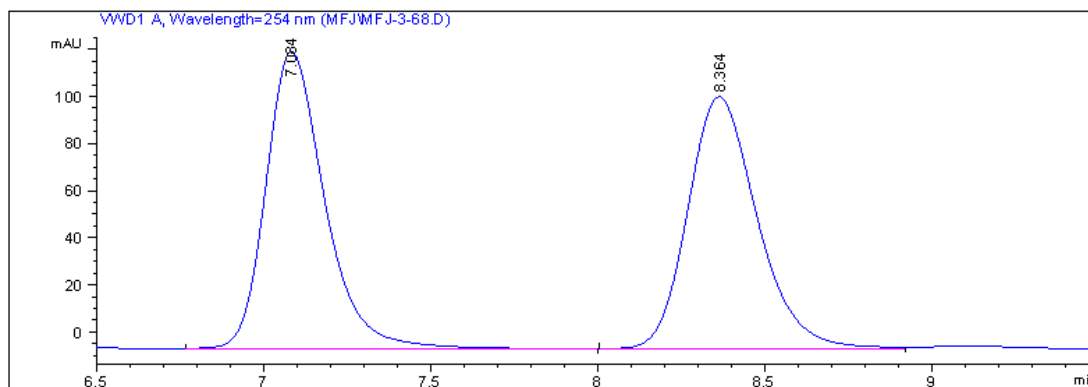

| Peak # | RetTime [min] | Type | Width [min] | Area [mAU*s] | Height [mAU] | Area %  |
|--------|---------------|------|-------------|--------------|--------------|---------|
| 1      | 7.084         | BB   | 0.1850      | 1532.01794   | 125.86562    | 49.9001 |
| 2      | 8.364         | BV   | 0.2210      | 1538.15088   | 106.81070    | 50.0999 |

**Enantioenriched:**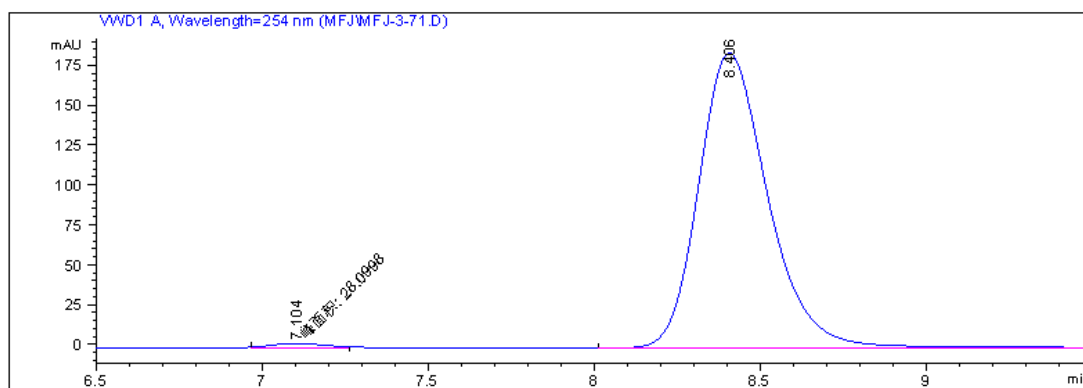

| Peak # | RetTime [min] | Type | Width [min] | Area [mAU*s] | Height [mAU] | Area %  |
|--------|---------------|------|-------------|--------------|--------------|---------|
| 1      | 7.104         | MM   | 0.1762      | 28.09982     | 2.65808      | 1.0379  |
| 2      | 8.406         | BB   | 0.2222      | 2679.16113   | 184.77682    | 98.9621 |

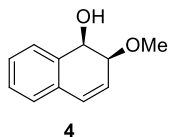

Racemic:

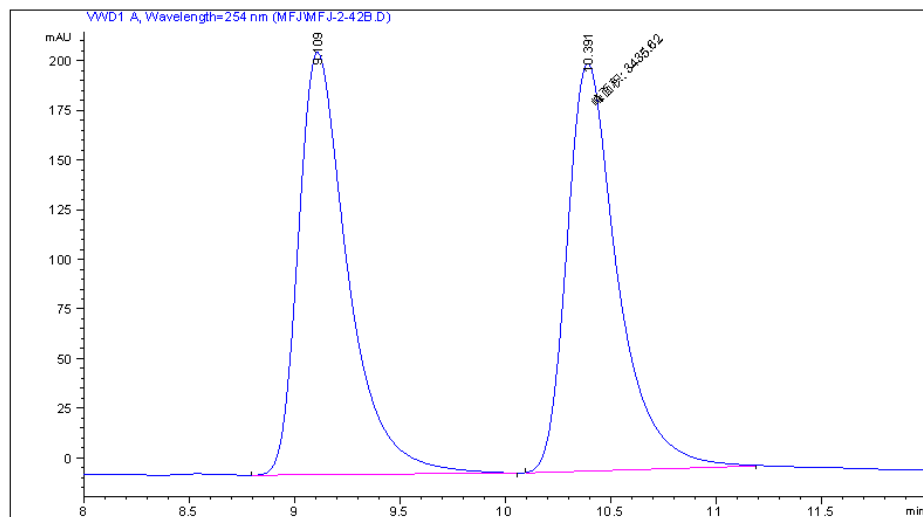

| Peak # | RetTime [min] | Type | Width [min] | Area [mAU*s] | Height [mAU] | Area %  |
|--------|---------------|------|-------------|--------------|--------------|---------|
| 1      | 9.109         | BB   | 0.2458      | 3477.58569   | 212.65042    | 50.3035 |
| 2      | 10.391        | MM   | 0.2788      | 3435.62012   | 205.35614    | 49.6965 |

Enantioenriched:

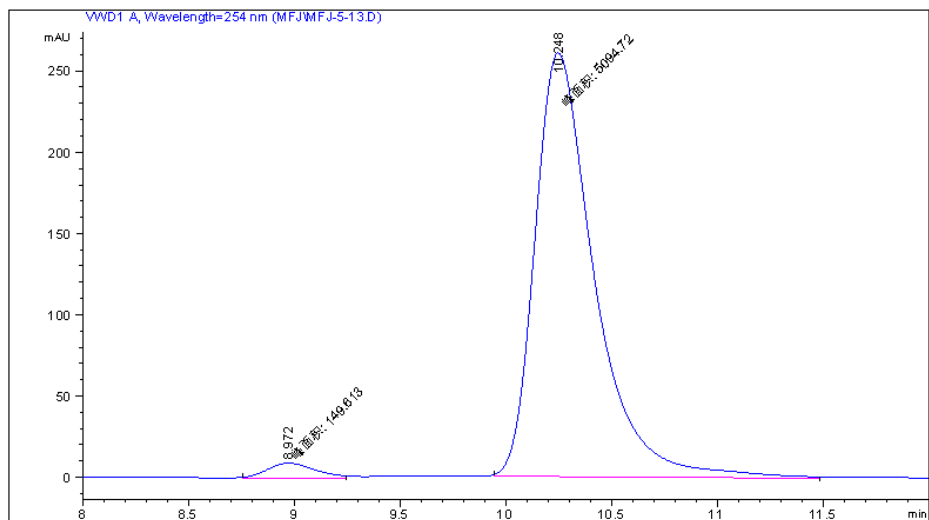

| Peak # | RetTime [min] | Type | Width [min] | Area [mAU*s] | Height [mAU] | Area %  |
|--------|---------------|------|-------------|--------------|--------------|---------|
| 1      | 8.972         | MM   | 0.2657      | 149.61299    | 9.38617      | 2.8529  |
| 2      | 10.248        | MM   | 0.3258      | 5094.71924   | 260.64209    | 97.1471 |

**H: X-Ray Crystallography of Compound 3aa**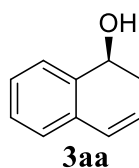

Crystal data:  $C_{10}H_{10}O$ ,  $M = 146.18$ ,  $a = 19.0072(9)$  Å,  $b = 19.0072(9)$  Å,  $c = 5.7243(3)$  Å,  $\alpha = 90^\circ$ ,  $\beta = 90^\circ$ ,  $\gamma = 120^\circ$ ,  $V = 1790.97(19)$  Å<sup>3</sup>,  $T = 100(2)$  K, space group  $R3:H$ ,  $Z = 9$ ,  $\mu(\text{CuK}\alpha) = 0.608$  mm<sup>-1</sup>, 4919 reflections measured, 1370 independent reflections ( $R_{int} = 0.1282$ ). The final  $R_I$  values were 0.0773 ( $I > 2\sigma(I)$ ). The final  $wR(F^2)$  values were 0.2082 ( $I > 2\sigma(I)$ ). The final  $R_I$  values were 0.0812 (all data). The final  $wR(F^2)$  values were 0.2129 (all data). The goodness of fit on  $F^2$  was 1.121. Flack parameter = 0.1(6).

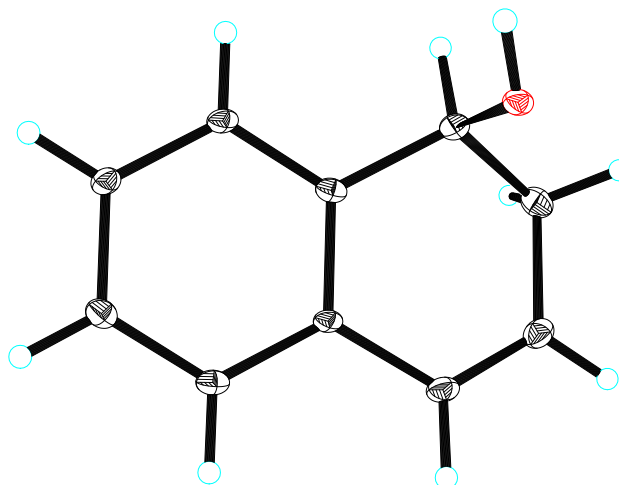

View of a molecule of **3aa** with the atom-labelling scheme.

Displacement ellipsoids are drawn at the 30% probability level.

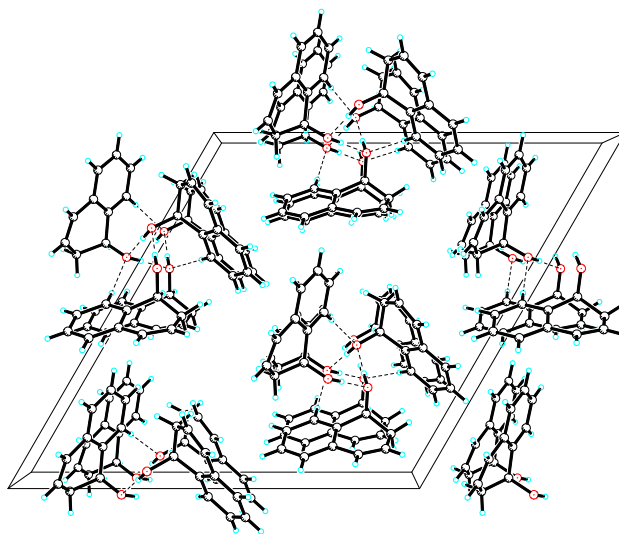View of the packing motif of **3aa**

Hydrogen-bonds are shown as dashed lines.

Table 1. Crystal data and structure refinement for **3aa**.

|                                  |                                        |                      |
|----------------------------------|----------------------------------------|----------------------|
| Identification code              | cu_3aa_0m                              |                      |
| Empirical formula                | C10 H10 O                              |                      |
| Formula weight                   | 146.18                                 |                      |
| Temperature                      | 100(2) K                               |                      |
| Wavelength                       | 1.54178 Å                              |                      |
| Crystal system                   | Trigonal                               |                      |
| Space group                      | R3                                     |                      |
| Unit cell dimensions             | a = 19.0072(9) Å                       | $\alpha = 90^\circ$  |
|                                  | b = 19.0072(9) Å                       | $\beta = 90^\circ$   |
|                                  | c = 5.7243(3) Å                        | $\gamma = 120^\circ$ |
| Volume                           | 1790.97(19) Å <sup>3</sup>             |                      |
| Z                                | 9                                      |                      |
| Density (calculated)             | 1.220 Mg/m <sup>3</sup>                |                      |
| Absorption coefficient           | 0.608 mm <sup>-1</sup>                 |                      |
| F(000)                           | 702                                    |                      |
| Crystal size                     | 1.860 x 0.350 x 0.350 mm <sup>3</sup>  |                      |
| Theta range for data collection  | 4.653 to 70.960 °                      |                      |
| Index ranges                     | -22 ≤ h ≤ 22, -22 ≤ k ≤ 22, -6 ≤ l ≤ 6 |                      |
| Reflections collected            | 4919                                   |                      |
| Independent reflections          | 1370 [R(int) = 0.1282]                 |                      |
| Completeness to theta = 67.679 ° | 97.5 %                                 |                      |

|                                   |                                             |
|-----------------------------------|---------------------------------------------|
| Absorption correction             | Semi-empirical from equivalents             |
| Refinement method                 | Full-matrix least-squares on F <sup>2</sup> |
| Data / restraints / parameters    | 1370 / 1 / 102                              |
| Goodness-of-fit on F <sup>2</sup> | 1.121                                       |
| Final R indices [I>2sigma(I)]     | R1 = 0.0773, wR2 = 0.2082                   |
| R indices (all data)              | R1 = 0.0812, wR2 = 0.2129                   |
| Absolute structure parameter      | 0.1(6)                                      |
| Extinction coefficient            | 0.006(2)                                    |
| Largest diff. peak and hole       | 0.436 and -0.486 e.Å <sup>-3</sup>          |

Table 2. Atomic coordinates ( $\times 10^4$ ) and equivalent isotropic displacement parameters ( $\text{\AA}^2 \times 10^3$ ) for **3aa**. U(eq) is defined as one third of the trace of the orthogonalized  $U^{ij}$  tensor.

|       | x       | y       | z        | U(eq) |
|-------|---------|---------|----------|-------|
| O(1)  | 7153(2) | 7314(2) | 252(6)   | 16(1) |
| C(1)  | 8783(2) | 8535(3) | 2402(8)  | 21(1) |
| C(2)  | 8458(3) | 8533(3) | -2(9)    | 22(1) |
| C(3)  | 7930(3) | 7675(2) | -935(7)  | 15(1) |
| C(4)  | 8298(2) | 7142(3) | -498(7)  | 14(1) |
| C(5)  | 8143(2) | 6510(3) | -2001(6) | 16(1) |
| C(6)  | 8428(2) | 5977(2) | -1468(8) | 17(1) |
| C(7)  | 8747(2) | 7258(2) | 1564(7)  | 14(1) |
| C(8)  | 8908(3) | 7940(3) | 3107(7)  | 19(1) |
| C(9)  | 9021(2) | 6715(3) | 2085(7)  | 16(1) |
| C(10) | 8864(3) | 6083(3) | 584(7)   | 18(1) |

Table 3. Bond lengths [ $\text{\AA}$ ] and angles [ $^\circ$ ] for **3aa**.

|            |          |
|------------|----------|
| O(1)-C(3)  | 1.448(5) |
| O(1)-H(10) | 0.8400   |
| C(1)-C(8)  | 1.330(7) |
| C(1)-C(2)  | 1.507(7) |
| C(1)-H(1)  | 0.9500   |
| C(2)-C(3)  | 1.523(6) |
| C(2)-H(3)  | 0.9900   |
| C(2)-H(9)  | 0.9900   |

---

|                 |          |
|-----------------|----------|
| C(3)-C(4)       | 1.512(6) |
| C(3)-H(8)       | 1.0000   |
| C(4)-C(5)       | 1.384(6) |
| C(4)-C(7)       | 1.408(5) |
| C(5)-C(6)       | 1.400(6) |
| C(5)-H(5)       | 0.9500   |
| C(6)-C(10)      | 1.394(6) |
| C(6)-H(2)       | 0.9500   |
| C(7)-C(9)       | 1.402(6) |
| C(7)-C(8)       | 1.469(6) |
| C(8)-H(4)       | 0.9500   |
| C(9)-C(10)      | 1.383(6) |
| C(9)-H(7)       | 0.9500   |
| C(10)-H(6)      | 0.9500   |
|                 |          |
| C(3)-O(1)-H(10) | 109.5    |
| C(8)-C(1)-C(2)  | 121.5(4) |
| C(8)-C(1)-H(1)  | 119.3    |
| C(2)-C(1)-H(1)  | 119.3    |
| C(1)-C(2)-C(3)  | 111.9(4) |
| C(1)-C(2)-H(3)  | 109.2    |
| C(3)-C(2)-H(3)  | 109.2    |
| C(1)-C(2)-H(9)  | 109.2    |
| C(3)-C(2)-H(9)  | 109.2    |
| H(3)-C(2)-H(9)  | 107.9    |
| O(1)-C(3)-C(4)  | 108.0(3) |
| O(1)-C(3)-C(2)  | 108.3(3) |
| C(4)-C(3)-C(2)  | 112.4(3) |
| O(1)-C(3)-H(8)  | 109.4    |
| C(4)-C(3)-H(8)  | 109.4    |
| C(2)-C(3)-H(8)  | 109.4    |
| C(5)-C(4)-C(7)  | 120.4(4) |
| C(5)-C(4)-C(3)  | 120.6(4) |
| C(7)-C(4)-C(3)  | 118.8(4) |
| C(4)-C(5)-C(6)  | 120.1(4) |
| C(4)-C(5)-H(5)  | 120.0    |
| C(6)-C(5)-H(5)  | 120.0    |
| C(10)-C(6)-C(5) | 119.8(4) |

---

|                 |          |
|-----------------|----------|
| C(10)-C(6)-H(2) | 120.1    |
| C(5)-C(6)-H(2)  | 120.1    |
| C(9)-C(7)-C(4)  | 118.9(4) |
| C(9)-C(7)-C(8)  | 122.1(4) |
| C(4)-C(7)-C(8)  | 119.0(4) |
| C(1)-C(8)-C(7)  | 121.4(4) |
| C(1)-C(8)-H(4)  | 119.3    |
| C(7)-C(8)-H(4)  | 119.3    |
| C(10)-C(9)-C(7) | 120.6(4) |
| C(10)-C(9)-H(7) | 119.7    |
| C(7)-C(9)-H(7)  | 119.7    |
| C(9)-C(10)-C(6) | 120.2(4) |
| C(9)-C(10)-H(6) | 119.9    |
| C(6)-C(10)-H(6) | 119.9    |

---

Symmetry transformations used to generate equivalent atoms:

Table 4. Anisotropic displacement parameters ( $\text{\AA}^2 \times 10^3$ ) for **3aa**. The anisotropic displacement factor exponent takes the form:  $-2\pi^2 [ h^2 a^{*2} U^{11} + \dots + 2 h k a^* b^* U^{12} ]$

---

|       | $U^{11}$ | $U^{22}$ | $U^{33}$ | $U^{23}$ | $U^{13}$ | $U^{12}$ |
|-------|----------|----------|----------|----------|----------|----------|
| O(1)  | 15(2)    | 24(2)    | 11(2)    | 0(1)     | 0(1)     | 11(1)    |
| C(1)  | 19(2)    | 20(2)    | 21(2)    | -6(2)    | -3(2)    | 8(2)     |
| C(2)  | 21(2)    | 20(2)    | 23(3)    | 5(2)     | -1(2)    | 10(2)    |
| C(3)  | 20(2)    | 20(2)    | 7(2)     | 3(1)     | 3(2)     | 10(2)    |
| C(4)  | 12(2)    | 20(2)    | 11(2)    | 4(2)     | 2(1)     | 7(2)     |
| C(5)  | 15(2)    | 25(2)    | 9(2)     | -2(2)    | 0(2)     | 11(2)    |
| C(6)  | 19(2)    | 22(2)    | 13(2)    | -3(2)    | -1(2)    | 12(2)    |
| C(7)  | 15(2)    | 20(2)    | 7(2)     | 2(1)     | 2(1)     | 9(2)     |
| C(8)  | 20(2)    | 27(2)    | 11(2)    | 0(2)     | 0(2)     | 12(2)    |
| C(9)  | 13(2)    | 23(2)    | 12(2)    | 1(2)     | 0(1)     | 8(2)     |
| C(10) | 19(2)    | 24(2)    | 14(3)    | 3(2)     | 3(2)     | 14(2)    |

---



Table 5. Hydrogen coordinates ( $\times 10^4$ ) and isotropic displacement parameters ( $\text{\AA}^2 \times 10^3$ ) for **3aa**.

|       | x    | y    | z     | U(eq) |
|-------|------|------|-------|-------|
| H(10) | 6780 | 7042 | -707  | 24    |
| H(1)  | 8900 | 8971 | 3437  | 25    |
| H(3)  | 8919 | 8842 | -1083 | 26    |
| H(9)  | 8135 | 8810 | 57    | 26    |
| H(8)  | 7844 | 7698 | -2651 | 19    |
| H(5)  | 7844 | 6438 | -3396 | 19    |
| H(2)  | 8323 | 5545 | -2502 | 21    |
| H(4)  | 9107 | 7957 | 4641  | 23    |
| H(7)  | 9318 | 6782 | 3483  | 20    |
| H(6)  | 9054 | 5719 | 952   | 21    |

Table 6. Torsion angles [ $^\circ$ ] for **3aa**.

|                      |           |
|----------------------|-----------|
| C(8)-C(1)-C(2)-C(3)  | 28.3(6)   |
| C(1)-C(2)-C(3)-O(1)  | 75.2(4)   |
| C(1)-C(2)-C(3)-C(4)  | -44.0(4)  |
| O(1)-C(3)-C(4)-C(5)  | 89.9(4)   |
| C(2)-C(3)-C(4)-C(5)  | -150.7(4) |
| O(1)-C(3)-C(4)-C(7)  | -84.9(4)  |
| C(2)-C(3)-C(4)-C(7)  | 34.4(5)   |
| C(7)-C(4)-C(5)-C(6)  | 0.5(6)    |
| C(3)-C(4)-C(5)-C(6)  | -174.3(4) |
| C(4)-C(5)-C(6)-C(10) | 0.2(6)    |
| C(5)-C(4)-C(7)-C(9)  | -1.0(6)   |
| C(3)-C(4)-C(7)-C(9)  | 173.8(4)  |
| C(5)-C(4)-C(7)-C(8)  | 179.3(4)  |
| C(3)-C(4)-C(7)-C(8)  | -5.9(5)   |
| C(2)-C(1)-C(8)-C(7)  | 0.8(6)    |
| C(9)-C(7)-C(8)-C(1)  | 167.1(4)  |
| C(4)-C(7)-C(8)-C(1)  | -13.2(6)  |
| C(4)-C(7)-C(9)-C(10) | 0.9(6)    |

---

|                      |           |
|----------------------|-----------|
| C(8)-C(7)-C(9)-C(10) | -179.4(3) |
| C(7)-C(9)-C(10)-C(6) | -0.2(6)   |
| C(5)-C(6)-C(10)-C(9) | -0.4(6)   |

---

Symmetry transformations used to generate equivalent atoms:

Table 7. Hydrogen bonds for **3aa** [Å and °].

---

| D-H...A             | d(D-H) | d(H...A) | d(D...A) | <(DHA) |
|---------------------|--------|----------|----------|--------|
| O(1)-H(10)...O(1)#1 | 0.84   | 1.87     | 2.708(4) | 174.1  |
| O(1)-H(10)...O(1)#1 | 0.84   | 1.87     | 2.708(4) | 174.1  |
| O(1)-H(10)...O(1)#1 | 0.84   | 1.87     | 2.708(4) | 174.1  |
| O(1)-H(10)...O(1)#1 | 0.84   | 1.87     | 2.708(4) | 174.1  |
| O(1)-H(10)...O(1)#1 | 0.84   | 1.87     | 2.708(4) | 174.1  |
| O(1)-H(10)...O(1)#1 | 0.84   | 1.87     | 2.708(4) | 174.1  |
| O(1)-H(10)...O(1)#1 | 0.84   | 1.87     | 2.708(4) | 174.1  |
| O(1)-H(10)...O(1)#1 | 0.84   | 1.87     | 2.708(4) | 174.1  |
| O(1)-H(10)...O(1)#1 | 0.84   | 1.87     | 2.708(4) | 174.1  |

---

Symmetry transformations used to generate equivalent atoms:

#1 -y+4/3,x-y+2/3,z-1/3

**I: X-Ray Crystallography of Compound 4**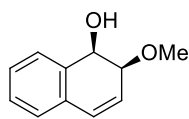

4

Crystal data for cu\_vmj1\_0m:  $C_{11}H_{12}O_2$ ,  $M = 176.21$ ,  $a = 4.6462(2) \text{ \AA}$ ,  $b = 9.7488(3) \text{ \AA}$ ,  $c = 19.6719(6) \text{ \AA}$ ,  $\alpha = 90^\circ$ ,  $\beta = 90^\circ$ ,  $\gamma = 90^\circ$ ,  $V = 891.04(5) \text{ \AA}^3$ ,  $T = 100(2) \text{ K}$ , space group  $P212121$ ,  $Z = 4$ ,  $\mu(\text{CuK}\alpha) = 0.720 \text{ mm}^{-1}$ , 4844 reflections measured, 1612 independent reflections ( $R_{int} = 0.0298$ ). The final  $R_I$  values were 0.0461 ( $I > 2\sigma(I)$ ). The final  $wR(F^2)$  values were 0.1384 ( $I > 2\sigma(I)$ ). The final  $R_I$  values were 0.0461 (all data). The final  $wR(F^2)$  values were 0.1385 (all data). The goodness of fit on  $F^2$  was 1.203. Flack parameter = 0.15(6).

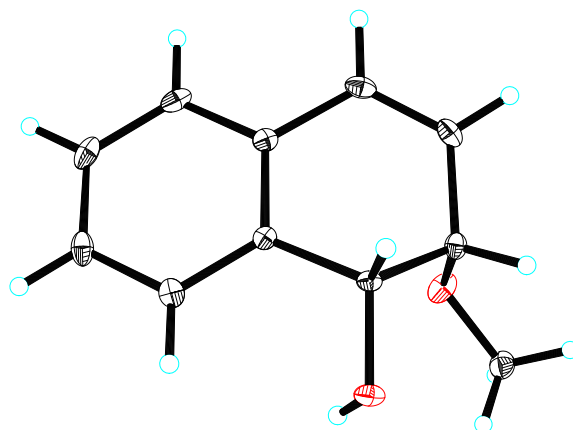

View of a molecule of vmfj1 with the atom-labelling scheme.  
Displacement ellipsoids are drawn at the 30% probability level.

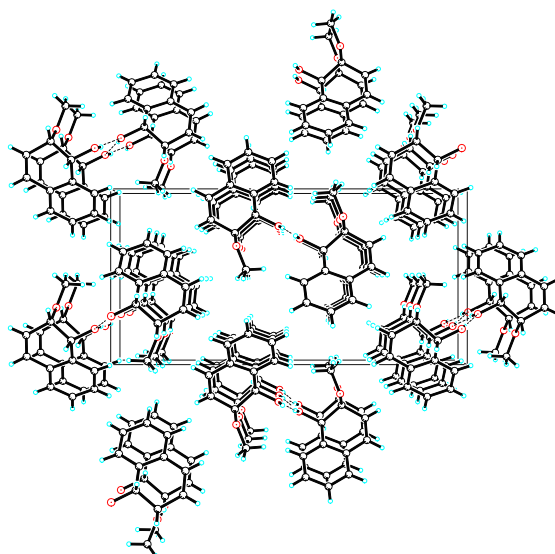

View of the pack drawing of vmfj1.

Hydrogen-bonds are shown as dashed lines.

Table 1. Crystal data and structure refinement for cu\_vm fj1\_0m.

|                                 |                                               |          |
|---------------------------------|-----------------------------------------------|----------|
| Identification code             | cu_vm fj1_0m                                  |          |
| Empirical formula               | C11 H12 O2                                    |          |
| Formula weight                  | 176.21                                        |          |
| Temperature                     | 100(2) K                                      |          |
| Wavelength                      | 1.54178 Å                                     |          |
| Crystal system                  | Orthorhombic                                  |          |
| Space group                     | P2 <sub>1</sub> 2 <sub>1</sub> 2 <sub>1</sub> |          |
| Unit cell dimensions            | a = 4.6462(2) Å                               | α = 90 ° |
|                                 | b = 9.7488(3) Å                               | β = 90 ° |
|                                 | c = 19.6719(6) Å                              | γ = 90 ° |
| Volume                          | 891.04(5) Å <sup>3</sup>                      |          |
| Z                               | 4                                             |          |
| Density (calculated)            | 1.314 Mg/m <sup>3</sup>                       |          |
| Absorption coefficient          | 0.720 mm <sup>-1</sup>                        |          |
| F(000)                          | 376                                           |          |
| Crystal size                    | 1.360 x 0.380 x 0.340 mm <sup>3</sup>         |          |
| Theta range for data collection | 5.063 to 69.794 °                             |          |
| Index ranges                    | -5 ≤ h ≤ 5, -9 ≤ k ≤ 11, -23 ≤ l ≤ 22         |          |
| Reflections collected           | 4844                                          |          |
| Independent reflections         | 1612 [R(int) = 0.0298]                        |          |

|                                   |                                             |
|-----------------------------------|---------------------------------------------|
| Completeness to theta = 67.679 °  | 98.7 %                                      |
| Absorption correction             | Semi-empirical from equivalents             |
| Refinement method                 | Full-matrix least-squares on F <sup>2</sup> |
| Data / restraints / parameters    | 1612 / 0 / 123                              |
| Goodness-of-fit on F <sup>2</sup> | 1.203                                       |
| Final R indices [I>2sigma(I)]     | R1 = 0.0461, wR2 = 0.1384                   |
| R indices (all data)              | R1 = 0.0461, wR2 = 0.1385                   |
| Absolute structure parameter      | 0.15(6)                                     |
| Extinction coefficient            | 0.046(7)                                    |
| Largest diff. peak and hole       | 0.365 and -0.367 e.Å <sup>-3</sup>          |

Table 2. Atomic coordinates ( $\times 10^4$ ) and equivalent isotropic displacement parameters ( $\text{\AA}^2 \times 10^3$ ) for cu\_vmfj1\_0m. U(eq) is defined as one third of the trace of the orthogonalized  $U^{ij}$  tensor.

|       | x       | y        | z       | U(eq) |
|-------|---------|----------|---------|-------|
| O(1)  | 2016(4) | 6729(2)  | 8549(1) | 25(1) |
| O(2)  | 5151(4) | 7884(2)  | 9708(1) | 18(1) |
| C(1)  | 2299(6) | 5395(3)  | 8812(1) | 26(1) |
| C(2)  | 4643(6) | 7486(2)  | 8485(1) | 17(1) |
| C(3)  | 4479(5) | 8235(3)  | 7813(1) | 20(1) |
| C(4)  | 3214(6) | 9454(3)  | 7775(1) | 21(1) |
| C(5)  | 2067(5) | 10149(2) | 8374(1) | 16(1) |
| C(6)  | 152(6)  | 11250(3) | 8318(1) | 22(1) |
| C(7)  | -992(6) | 11859(3) | 8895(2) | 24(1) |
| C(8)  | 2857(5) | 9677(2)  | 9023(1) | 13(1) |
| C(9)  | 1735(5) | 10302(2) | 9596(1) | 18(1) |
| C(10) | -198(6) | 11388(2) | 9533(1) | 22(1) |
| C(11) | 5026(5) | 8528(2)  | 9059(1) | 14(1) |

Table 3. Bond lengths [ $\text{\AA}$ ] and angles [ $^\circ$ ] for cu\_vmfj1\_0m.

|            |          |
|------------|----------|
| O(1)-C(1)  | 1.406(3) |
| O(1)-C(2)  | 1.432(3) |
| O(2)-C(11) | 1.424(3) |
| O(2)-H(9)  | 0.84(5)  |
| C(1)-H(3)  | 0.9800   |

---

|                  |            |
|------------------|------------|
| C(1)-H(12)       | 0.9800     |
| C(1)-H(1)        | 0.9800     |
| C(2)-C(3)        | 1.512(3)   |
| C(2)-C(11)       | 1.529(3)   |
| C(2)-H(11)       | 1.0000     |
| C(3)-C(4)        | 1.328(4)   |
| C(3)-H(4)        | 0.9500     |
| C(4)-C(5)        | 1.460(3)   |
| C(4)-H(5)        | 0.9500     |
| C(5)-C(6)        | 1.398(3)   |
| C(5)-C(8)        | 1.406(3)   |
| C(6)-C(7)        | 1.387(4)   |
| C(6)-H(6)        | 0.9500     |
| C(7)-C(10)       | 1.387(4)   |
| C(7)-H(2)        | 0.9500     |
| C(8)-C(9)        | 1.384(3)   |
| C(8)-C(11)       | 1.508(3)   |
| C(9)-C(10)       | 1.394(4)   |
| C(9)-H(8)        | 0.9500     |
| C(10)-H(7)       | 0.9500     |
| C(11)-H(10)      | 1.0000     |
|                  |            |
| C(1)-O(1)-C(2)   | 115.4(2)   |
| C(11)-O(2)-H(9)  | 105(2)     |
| O(1)-C(1)-H(3)   | 109.5      |
| O(1)-C(1)-H(12)  | 109.5      |
| H(3)-C(1)-H(12)  | 109.5      |
| O(1)-C(1)-H(1)   | 109.5      |
| H(3)-C(1)-H(1)   | 109.5      |
| H(12)-C(1)-H(1)  | 109.5      |
| O(1)-C(2)-C(3)   | 106.41(19) |
| O(1)-C(2)-C(11)  | 112.16(19) |
| C(3)-C(2)-C(11)  | 109.30(19) |
| O(1)-C(2)-H(11)  | 109.6      |
| C(3)-C(2)-H(11)  | 109.6      |
| C(11)-C(2)-H(11) | 109.6      |
| C(4)-C(3)-C(2)   | 120.2(2)   |
| C(4)-C(3)-H(4)   | 119.9      |

---

|                  |            |
|------------------|------------|
| C(2)-C(3)-H(4)   | 119.9      |
| C(3)-C(4)-C(5)   | 122.1(2)   |
| C(3)-C(4)-H(5)   | 118.9      |
| C(5)-C(4)-H(5)   | 118.9      |
| C(6)-C(5)-C(8)   | 119.3(2)   |
| C(6)-C(5)-C(4)   | 121.6(2)   |
| C(8)-C(5)-C(4)   | 119.0(2)   |
| C(7)-C(6)-C(5)   | 120.5(2)   |
| C(7)-C(6)-H(6)   | 119.8      |
| C(5)-C(6)-H(6)   | 119.8      |
| C(10)-C(7)-C(6)  | 119.9(2)   |
| C(10)-C(7)-H(2)  | 120.1      |
| C(6)-C(7)-H(2)   | 120.1      |
| C(9)-C(8)-C(5)   | 119.8(2)   |
| C(9)-C(8)-C(11)  | 122.7(2)   |
| C(5)-C(8)-C(11)  | 117.44(19) |
| C(8)-C(9)-C(10)  | 120.3(2)   |
| C(8)-C(9)-H(8)   | 119.8      |
| C(10)-C(9)-H(8)  | 119.8      |
| C(7)-C(10)-C(9)  | 120.2(2)   |
| C(7)-C(10)-H(7)  | 119.9      |
| C(9)-C(10)-H(7)  | 119.9      |
| O(2)-C(11)-C(8)  | 113.41(18) |
| O(2)-C(11)-C(2)  | 111.91(18) |
| C(8)-C(11)-C(2)  | 112.39(19) |
| O(2)-C(11)-H(10) | 106.2      |
| C(8)-C(11)-H(10) | 106.2      |
| C(2)-C(11)-H(10) | 106.2      |

---

Symmetry transformations used to generate equivalent atoms:

Table 4. Anisotropic displacement parameters ( $\text{\AA}^2 \times 10^3$ ) for cu\_vm fj1\_0m. The anisotropic displacement factor exponent takes the form:  $-2\pi^2 [h^2 a^{*2} U^{11} + \dots + 2 h k a^* b^* U^{12}]$

|       | $U^{11}$ | $U^{22}$ | $U^{33}$ | $U^{23}$ | $U^{13}$ | $U^{12}$ |
|-------|----------|----------|----------|----------|----------|----------|
| O(1)  | 17(1)    | 19(1)    | 38(1)    | 4(1)     | -5(1)    | -3(1)    |
| O(2)  | 9(1)     | 29(1)    | 16(1)    | 7(1)     | -1(1)    | 0(1)     |
| C(1)  | 27(1)    | 17(1)    | 33(1)    | 2(1)     | 8(1)     | -1(1)    |
| C(2)  | 13(1)    | 17(1)    | 22(1)    | -2(1)    | 0(1)     | 1(1)     |
| C(3)  | 16(1)    | 29(1)    | 16(1)    | -6(1)    | 1(1)     | 0(1)     |
| C(4)  | 17(1)    | 30(1)    | 15(1)    | 4(1)     | -2(1)    | -4(1)    |
| C(5)  | 11(1)    | 18(1)    | 19(1)    | 2(1)     | 0(1)     | -2(1)    |
| C(6)  | 17(1)    | 20(1)    | 29(1)    | 10(1)    | -2(1)    | -2(1)    |
| C(7)  | 16(1)    | 15(1)    | 42(2)    | 2(1)     | 0(1)     | 1(1)     |
| C(8)  | 9(1)     | 13(1)    | 18(1)    | 0(1)     | 0(1)     | -4(1)    |
| C(9)  | 13(1)    | 20(1)    | 21(1)    | -4(1)    | -2(1)    | -3(1)    |
| C(10) | 15(1)    | 20(1)    | 32(1)    | -9(1)    | 3(1)     | -1(1)    |
| C(11) | 9(1)     | 17(1)    | 14(1)    | 4(1)     | 0(1)     | -2(1)    |

Table 5. Hydrogen coordinates ( $\times 10^4$ ) and isotropic displacement parameters ( $\text{\AA}^2 \times 10^{-3}$ ) for cu\_vm fj1\_0m.

|       | x         | y        | z        | U(eq) |
|-------|-----------|----------|----------|-------|
| H(9)  | 3420(100) | 7760(30) | 9821(17) | 27    |
| H(3)  | 3836      | 4912     | 8569     | 38    |
| H(12) | 481       | 4898     | 8753     | 38    |
| H(1)  | 2776      | 5445     | 9296     | 38    |
| H(11) | 6311      | 6838     | 8481     | 21    |
| H(4)  | 5285      | 7831     | 7417     | 24    |
| H(5)  | 3049      | 9888     | 7344     | 25    |
| H(6)  | -369      | 11584    | 7881     | 26    |
| H(2)  | -2317     | 12596    | 8853     | 29    |
| H(8)  | 2286      | 9990     | 10035    | 22    |
| H(7)  | -973      | 11808    | 9929     | 27    |
| H(10) | 6953      | 8961     | 8986     | 16    |



Table 6. Torsion angles [°] for cu\_vmj1\_0m.

---

|                       |             |
|-----------------------|-------------|
| C(1)-O(1)-C(2)-C(3)   | 138.8(2)    |
| C(1)-O(1)-C(2)-C(11)  | -101.7(2)   |
| O(1)-C(2)-C(3)-C(4)   | 86.3(3)     |
| C(11)-C(2)-C(3)-C(4)  | -35.0(3)    |
| C(2)-C(3)-C(4)-C(5)   | 3.1(4)      |
| C(3)-C(4)-C(5)-C(6)   | -164.3(2)   |
| C(3)-C(4)-C(5)-C(8)   | 14.2(4)     |
| C(8)-C(5)-C(6)-C(7)   | -1.0(4)     |
| C(4)-C(5)-C(6)-C(7)   | 177.5(2)    |
| C(5)-C(6)-C(7)-C(10)  | 1.1(4)      |
| C(6)-C(5)-C(8)-C(9)   | 0.1(3)      |
| C(4)-C(5)-C(8)-C(9)   | -178.4(2)   |
| C(6)-C(5)-C(8)-C(11)  | -177.4(2)   |
| C(4)-C(5)-C(8)-C(11)  | 4.1(3)      |
| C(5)-C(8)-C(9)-C(10)  | 0.7(3)      |
| C(11)-C(8)-C(9)-C(10) | 178.0(2)    |
| C(6)-C(7)-C(10)-C(9)  | -0.3(4)     |
| C(8)-C(9)-C(10)-C(7)  | -0.6(4)     |
| C(9)-C(8)-C(11)-O(2)  | 17.8(3)     |
| C(5)-C(8)-C(11)-O(2)  | -164.84(19) |
| C(9)-C(8)-C(11)-C(2)  | 146.0(2)    |
| C(5)-C(8)-C(11)-C(2)  | -36.7(3)    |
| O(1)-C(2)-C(11)-O(2)  | 61.4(3)     |
| C(3)-C(2)-C(11)-O(2)  | 179.13(18)  |
| O(1)-C(2)-C(11)-C(8)  | -67.6(2)    |
| C(3)-C(2)-C(11)-C(8)  | 50.2(3)     |

---

Symmetry transformations used to generate equivalent atoms:

Table 7. Hydrogen bonds for cu\_vmj1\_0m [ $\text{\AA}$  and  $^\circ$ ].

| D-H...A            | d(D-H)  | d(H...A) | d(D...A)   | $\angle(\text{DHA})$ |
|--------------------|---------|----------|------------|----------------------|
| O(2)-H(9)...O(2)#1 | 0.84(5) | 1.88(4)  | 2.6980(16) | 161(3)               |
| O(2)-H(9)...O(2)#1 | 0.84(5) | 1.88(4)  | 2.6980(16) | 161(3)               |
| O(2)-H(9)...O(2)#1 | 0.84(5) | 1.88(4)  | 2.6980(16) | 161(3)               |
| O(2)-H(9)...O(2)#1 | 0.84(5) | 1.88(4)  | 2.6980(16) | 161(3)               |
| O(2)-H(9)...O(2)#1 | 0.84(5) | 1.88(4)  | 2.6980(16) | 161(3)               |
| O(2)-H(9)...O(2)#1 | 0.84(5) | 1.88(4)  | 2.6980(16) | 161(3)               |
| O(2)-H(9)...O(2)#1 | 0.84(5) | 1.88(4)  | 2.6980(16) | 161(3)               |

Symmetry transformations used to generate equivalent atoms:

#1  $x-1/2, -y+3/2, -z+2$
